# Supplementary material for: Nederlandse vertaling en eerste stappen in validatie van de PPEET om burger- en patiëntenparticipatie te evalueren
Source: Springer Nature journal article supplement (doi:10.1007/s12508-021-00316-9), 2021-10-11
Supplement: MOESM1 [file 19747732]

**Tabel A1. Resultatenoverzicht van oorspronkelijke en aanvullende sensitiviteitsanalyses**

|                                         | alle items | items met helderheidsscore $\geq 7$ |
|-----------------------------------------|------------|-------------------------------------|
| <b>participantenvragenlijst</b>         |            |                                     |
| <i>aantal items, n</i>                  |            |                                     |
| module A                                | 21         | 20                                  |
| module B                                | 22         | 22                                  |
| appendix                                | 6          | 6                                   |
| <i>haalbaarheid, n (%)</i>              |            |                                     |
| ontbrekende antwoorden                  | 58 (8)     | 58 (8)                              |
| incorrecte antwoorden                   | 27 (4)     | 26 (4)                              |
| correcte antwoorden                     | 625 (88)   | 611 (88)                            |
| <i>betrouwbaarheid, Cronbach's alfa</i> |            |                                     |
| module A                                | 0,91       | 0,91                                |
| module B                                | 0,90       | 0,90                                |
| appendix                                | -          | -                                   |
| <b>projectvragenlijst</b>               |            |                                     |
| <i>aantal items, n</i>                  |            |                                     |
| module A                                | 15         | 12                                  |
| module B                                | 15         | 14                                  |
| module C                                | 8          | 6                                   |
| <i>haalbaarheid, n (%)</i>              |            |                                     |
| ontbrekende antwoorden                  | 42 (8)     | 32 (8)                              |
| incorrecte antwoorden                   | 22 (4)     | 13 (3)                              |
| correcte antwoorden                     | 441 (87)   | 382 (90)                            |
| <i>betrouwbaarheid, Cronbach's alfa</i> |            |                                     |
| module A                                | 0,91       | 0,91                                |
| module B                                | 0,90       | 0,90                                |
| module C                                | -          | -                                   |
| <b>organisatievragenlijst</b>           |            |                                     |
| <i>aantal items, n</i>                  |            |                                     |
| totaal                                  | 30         | 27                                  |
| <i>haalbaarheid, n (%)</i>              |            |                                     |
| ontbrekende antwoorden                  | 43 (12)    | 42 (13)                             |
| incorrecte antwoorden                   | 2 (1)      | 2 (1)                               |
| correcte antwoorden                     | 315 (88)   | 280 (86)                            |
| <i>betrouwbaarheid, Cronbach's alfa</i> |            |                                     |
| totaal                                  | 0,94       | 0,91                                |
