# Supplementary material for: Nederlandse vertaling en eerste stappen in validatie van de PPEET om burger- en patiëntenparticipatie te evalueren
Source: Springer Nature journal article supplement (doi:10.1007/s12508-021-00316-9), 2021-10-11
Supplement: MOESM2 [file 19747732]

**Tabel B1. Analyse voorlopige vertaling Participatenvragenlijst (versie 0)**

| <b>MODULE A. EENMALIGE PARTICIPATIE-ACTIVITEITEN</b>                                                                               | <b>Antwoordopties</b>                                                                                                                                                                                                                                                                                | <b>Gemiddelde score (SD)</b> | <b>Feedback</b> | <b>Ontbrekende / incorrecte / correcte antwoorden</b> |
|------------------------------------------------------------------------------------------------------------------------------------|------------------------------------------------------------------------------------------------------------------------------------------------------------------------------------------------------------------------------------------------------------------------------------------------------|------------------------------|-----------------|-------------------------------------------------------|
| Introductietekst                                                                                                                   | -                                                                                                                                                                                                                                                                                                    | 6,6 (2,0)                    | VO, WT          | -                                                     |
| <b>Achtergrondinformatie</b>                                                                                                       |                                                                                                                                                                                                                                                                                                      |                              |                 |                                                       |
| 1. Welke rol vertegenwoordigde u in [voeg naam van participatie-activiteit in]?                                                    | Meerkeuze:<br><ul style="list-style-type: none"> <li>▪ Patiënt/patiëntvertegenwoordiger (adviseur of co-onderzoeker)</li> <li>▪ Familielid/mantelzorger</li> <li>▪ Personeelslid</li> <li>▪ Lid van de gemeenschap</li> <li>▪ Partner van de gemeenschap</li> <li>▪ Anders, licht toe:...</li> </ul> | 6,7 (2,2)                    | WT              | 0/1/14                                                |
| 2. Hoe lang werkt u bij [organisatie] als medewerker of bent u betrokken bij [organisatie] als patiënt-/familie-vertegenwoordiger? | Meerkeuze:<br><ul style="list-style-type: none"> <li>▪ Kortere dan 6 maanden</li> <li>▪ 6 – 12 maanden</li> <li>▪ 1 – 2 jaar</li> <li>▪ 2 – 4 jaar</li> <li>▪ 5 jaar of langer</li> </ul>                                                                                                            | 7,0 (2,3)                    | PO, WT          | 0/0/15                                                |
| <b>Deel A. Communicatie en ondersteuning voor participatie</b>                                                                     |                                                                                                                                                                                                                                                                                                      |                              |                 |                                                       |
| 3. Het was mij duidelijk wat het doel was van [naam van participatie-activiteit].                                                  | Likertschaal:<br><ul style="list-style-type: none"> <li>▪ Zeer mee oneens</li> </ul>                                                                                                                                                                                                                 | 7,4 (2,1)                    | WT              | 0/0/15                                                |

## Appendix B. Overzicht feedback voorlopige vertaling PPEET (versie 0)

|                                                                                                                                                                                               | <ul style="list-style-type: none"> <li>▪ Mee oneens</li> <li>▪ Niet mee eens, niet mee oneens</li> <li>▪ Mee eens</li> <li>▪ Zeer mee eens</li> </ul> |           |        |         |  |
|-----------------------------------------------------------------------------------------------------------------------------------------------------------------------------------------------|-------------------------------------------------------------------------------------------------------------------------------------------------------|-----------|--------|---------|--|
| 4. De praktische ondersteuning die ik nodig had om deel te nemen was beschikbaar (bijvoorbeeld vervoer, kinderopvang, vergaderaccommodatie, tolk/begeleiding, vergoeding van kosten, etc.)    | Likertschaal: <i>Zie bij vraag 3</i>                                                                                                                  | 7,5 (1,4) | VO, WT | 0/0/15  |  |
| 5. Ik had genoeg informatie (gekregen) om mee te praten over het onderwerp dat werd besproken.                                                                                                | Likertschaal: <i>Zie bij vraag 3</i>                                                                                                                  | 7,5 (1,2) | VO     | 0/1/14  |  |
| 6. Wat zou u ons verder willen laten weten over hoe uw deelname aan [naam participatie-activiteit] werd ondersteund? U kunt hieronder ook uw antwoorden op de bovenstaande vragen toelichten. | open                                                                                                                                                  | 8,8 (0,8) | -      | 2*/1/12 |  |
| <b>Deel B. Het delen van uw mening en invalshoek</b>                                                                                                                                          |                                                                                                                                                       |           |        |         |  |
| 7. Ik kon mijn opvattingen vrijelijk uiten                                                                                                                                                    | Likertschaal: <i>Zie bij vraag 3</i>                                                                                                                  | 8,2 (1,5) | -      | 0/0/15  |  |
| 8. Ik had het gevoel dat mijn mening werd gehoord.                                                                                                                                            | Likertschaal: <i>Zie bij vraag 3</i>                                                                                                                  | 8,2 (1,5) | -      | 1/0/14  |  |
| 9. Er werd een breed scala aan meningen gedeeld over de onderwerpen die werden besproken.                                                                                                     | Likertschaal: <i>Zie bij vraag 3</i>                                                                                                                  | 7,9 (1,7) | BT, WT | 1/0/14  |  |
| 10. De deelnemers aan [naam participatie-activiteit] vertegenwoordigden diverse invalshoeken op het onderwerp.                                                                                | Likertschaal: <i>Zie bij vraag 3</i>                                                                                                                  | 7,7 (2,3) | VO, WT | 1/0/14  |  |
| 11. Wat zou u ons verder willen laten weten over hoe u uw mening kon delen? U kunt hieronder ook uw antwoorden op de bovenstaande vragen toelichten.                                          | open                                                                                                                                                  | 8,1 (1,8) | -      | 4*/1/10 |  |
| <b>Deel C. Impact en invloed van de participatie-activiteit</b>                                                                                                                               |                                                                                                                                                       |           |        |         |  |
| 12. Ik denk dat de doelen die [organisatie] had voor [naam participatie-activiteit] zijn bereikt                                                                                              | Likertschaal: <i>Zie bij vraag 3</i>                                                                                                                  | 7,4 (1,2) | PO, WT | 0/0/15  |  |

## Appendix B. Overzicht feedback voorlopige vertaling PPEET (versie 0)

|                                                                                                                                                                                                                                                                  |                                      |                              |                 |                                 |
|------------------------------------------------------------------------------------------------------------------------------------------------------------------------------------------------------------------------------------------------------------------|--------------------------------------|------------------------------|-----------------|---------------------------------|
| 13. Ik heb er vertrouwen in dat de inbreng die via deze activiteit werd geleverd zal worden gebruikt door [organisatie].                                                                                                                                         | Likertschaal: <i>Zie bij vraag 3</i> | 8,3 (1,0)                    | -               | 0/0/15                          |
| 14. Ik denk dat de inbreng die via deze activiteit werd geleverd een verschil zal maken in het werk van de organisatie.                                                                                                                                          | Likertschaal: <i>Zie bij vraag 3</i> | 8,3 (0,9)                    | -               | 0/0/15                          |
| 15. Wat zou u ons verder willen laten weten over de invloed die u denkt dat [naam participatie-activiteit] zal hebben? U kunt hieronder ook uw antwoorden op de bovenstaande vragen toelichten.                                                                  | open                                 | 8,6 (0,9)                    | -               | 2*/2/11                         |
| <b>Deel D. Ter afsluiting</b>                                                                                                                                                                                                                                    |                                      |                              |                 |                                 |
| 16. Als gevolg van mijn deelname aan [naam participatie-activiteit], ben ik beter geïnformeerd over [vraag de organisatie hier een relevante term in te voegen, bijvoorbeeld patiënten participatie-kwestie, organisatie, gezondheidszorgsysteem, andere focus]. | Likertschaal: <i>Zie bij vraag 3</i> | 8,2 (1,4)                    | -               | 0/0/15                          |
| 17. Over het geheel genomen was ik tevreden met dit participatie-initiatief.                                                                                                                                                                                     | Likertschaal: <i>Zie bij vraag 3</i> | 8,9 (0,8)                    | -               | 0/0/15                          |
| 18. Dit participatie-initiatief was een goede besteding van mijn tijd.                                                                                                                                                                                           | Likertschaal: <i>Zie bij vraag 3</i> | 9,0 (0,9)                    | -               | 0/1/14                          |
| 19. Wat waren de sterke punten van [naam participatie-activiteit]?                                                                                                                                                                                               | open                                 | 8,8 (1,1)                    | -               | 2/0/13                          |
| 20. Wat zou er verbeterd kunnen worden aan [naam participatie-activiteit]?                                                                                                                                                                                       | open                                 | 8,9 (0,9)                    | -               | 4*/0/11                         |
| 21. Wat zou u ons verder willen laten weten over uw ervaring met [naam participatie-activiteit]? U kunt hieronder ook uw antwoorden op de bovenstaande vragen toelichten.                                                                                        | open                                 | 8,9 (0,9)                    | -               | 4*/0/11                         |
| <i>Gemiddelde helderheidsscore Totaal (SD)</i>                                                                                                                                                                                                                   | -                                    | 8,0 (0,7)                    | -               | -                               |
| <i>Ontbrekende/incorrecte/correcte antwoorden Totaal</i>                                                                                                                                                                                                         | -                                    | -                            | -               | 21/7/288                        |
| <b>MODULE B. STRUCTURELE PARTICIPATIE-ACTIVITEITEN</b>                                                                                                                                                                                                           | <b>Antwoordopties</b>                | <b>Gemiddelde score (SD)</b> | <b>Feedback</b> | <b>Ontbrekende / incorrecte</b> |

Appendix B. Overzicht feedback voorlopige vertaling PPEET (versie 0)

|                                                                                                          |                                                                                                                                                                                                                                                                                                      |           |    | <b>/ correcte<br/>antwoorden</b> |
|----------------------------------------------------------------------------------------------------------|------------------------------------------------------------------------------------------------------------------------------------------------------------------------------------------------------------------------------------------------------------------------------------------------------|-----------|----|----------------------------------|
| Introductietekst                                                                                         | -                                                                                                                                                                                                                                                                                                    | 6,8 (1,6) | WT | -                                |
| <b>Achtergrondinformatie</b>                                                                             |                                                                                                                                                                                                                                                                                                      |           |    |                                  |
| 1. Welk perspectief vertegenwoordigt u in [naam van participatie-initiatief]?                            | Meerkeuze:<br><ul style="list-style-type: none"> <li>▪ Patiënt/patiëntvertegenwoordiger (adviseur of co-onderzoeker)</li> <li>▪ Familielid/mantelzorger</li> <li>▪ Personeelslid</li> <li>▪ Lid van de gemeenschap</li> <li>▪ Partner van de gemeenschap</li> <li>▪ Anders, licht toe:...</li> </ul> | 7,4 (2,0) | WT | 0/1/13                           |
| 2. Hoe lang werkt u bij [organisatie] als medewerker of patiënt-/familie/-gemeenschapsvertegenwoordiger? | Meerkeuze:<br><ul style="list-style-type: none"> <li>▪ Kortere dan 6 maanden</li> <li>▪ 6 – 12 maanden</li> <li>▪ 1 – 2 jaar</li> <li>▪ 2 – 4 jaar</li> <li>5 jaar of langer</li> </ul>                                                                                                              | 7,9 (1,8) | WT | 0/0/14                           |
| <b>Deel A. Communicatie en ondersteuning voor participatie</b>                                           |                                                                                                                                                                                                                                                                                                      |           |    |                                  |
| 3. Het is mij duidelijk wat het doel is van [naam van participatie-initiatief].                          | Likertschaal:<br><ul style="list-style-type: none"> <li>▪ Zeer mee oneens</li> <li>▪ Mee oneens</li> <li>▪ Niet mee eens, niet mee oneens</li> <li>▪ Mee eens</li> </ul>                                                                                                                             | 8,4 (0,9) | -  | 0/0/14                           |

## Appendix B. Overzicht feedback voorlopige vertaling PPEET (versie 0)

|                                                                                                                                      | ▪ Zeer mee eens                      |           |        |         |
|--------------------------------------------------------------------------------------------------------------------------------------|--------------------------------------|-----------|--------|---------|
| 4. De ondersteuning die ik nodig heb om deel te nemen is beschikbaar (bijvoorbeeld vervoer, kinderopvang, etc.)                      | Likertschaal: <i>Zie bij vraag 3</i> | 8,1 (1,4) | -      | 0/0/14  |
| 5. Ik heb genoeg informatie om mijn rol uit te kunnen voeren.                                                                        | Likertschaal: <i>Zie bij vraag 3</i> | 8,3 (1,2) | -      | 0/0/14  |
| 6. Wat zou u ons verder willen laten weten over hoe uw deelname aan [naam participatie-initiatief] wordt ondersteund?                | open                                 | 8,6 (0,7) | -      | 4*/4/6  |
| <b>Deel B. Het delen van uw mening en invalshoek</b>                                                                                 |                                      |           |        |         |
| 7. Ik kan mijn opvattingen vrijelijk uiten.                                                                                          | Likertschaal: <i>Zie bij vraag 3</i> | 8,3 (1,7) | -      | 0/0/14  |
| 8. Ik heb het gevoel dat mijn opvattingen worden gehoord.                                                                            | Likertschaal: <i>Zie bij vraag 3</i> | 8,4 (1,6) | -      | 0/0/14  |
| 9. Er wordt een breed scala aan opvattingen gedeeld over de onderwerpen die worden besproken.                                        | Likertschaal: <i>Zie bij vraag 3</i> | 8,4 (1,6) | -      | 0/0/14  |
| 10. De deelnemers aan [naam participatie-initiatief] vertegenwoordigen zeer diverse perspectieven op het onderwerp.                  | Likertschaal: <i>Zie bij vraag 3</i> | 7,9 (1,7) | VO, WT | 0/0/14  |
| 11. Wat zou u ons verder willen laten weten over hoe u uw opvattingen kunt delen?                                                    | open                                 | 8,5 (1,7) | -      | 6*/1/7  |
| <b>Deel C. Impact en invloed van de participatie-activiteit</b>                                                                      |                                      |           |        |         |
| 12. Ik denk dat [naam participatie-initiatief] zijn geformuleerde doelen bereikt.                                                    | Likertschaal: <i>Zie bij vraag 3</i> | 7,8 (1,1) | PO, WT | 0/0/14  |
| 13. Ik heb er vertrouwen in dat [organisatie] de feedback die via [naam participatie-initiatief] wordt geleverd in overweging neemt. | Likertschaal: <i>Zie bij vraag 3</i> | 7,9 (1,2) |        | 0/0/14  |
| 14. Ik denk dat het werk van [naam participatie-initiatief] een verschil maakt in het werk van de organisatie.                       | Likertschaal: <i>Zie bij vraag 3</i> | 8,1 (1,0) | -      | 0/1/13  |
| 15. Welke invloed denkt u dat u, in uw rol, heeft gehad tot nu toe?                                                                  | open                                 | 8,9 (0,9) | -      | 0/3/11  |
| 16. Wat zou u ons verder willen laten weten over de invloed die u denkt dat [naam participatie-initiatief] heeft?                    | open                                 | 8,9 (0,9) | -      | 3*/1/10 |

## Deel D. Ter afsluiting

Appendix B. Overzicht feedback voorlopige vertaling PPEET (versie 0)

|                                                                                                                                                                                                                                                                  |                                                                                                                              |                              |                 |                                                       |
|------------------------------------------------------------------------------------------------------------------------------------------------------------------------------------------------------------------------------------------------------------------|------------------------------------------------------------------------------------------------------------------------------|------------------------------|-----------------|-------------------------------------------------------|
| 17. Als gevolg van mijn deelname aan [naam participatie-activiteit], ben ik beter geïnformeerd over [vraag de organisatie hier een relevante term in te voegen, bijvoorbeeld patiënten participatie-kwestie, organisatie, gezondheidszorgsysteem, andere focus]. | Likertschaal: <i>Zie bij vraag 3</i>                                                                                         | 8,5 (1,1)                    | -               | 0/0/14                                                |
| 18. Over het geheel genomen ben ik tevreden met dit participatie-initiatief.                                                                                                                                                                                     | Likertschaal: <i>Zie bij vraag 3</i>                                                                                         | 8,8 (1,1)                    | -               | 1/0/13                                                |
| 19. Dit participatie-initiatief is een goede besteding van mijn tijd.                                                                                                                                                                                            | Likertschaal: <i>Zie bij vraag 3</i>                                                                                         | 9,1 (0,6)                    | -               | 0/0/14                                                |
| 20. Wat zijn de sterke punten van [naam participatie-initiatief]?                                                                                                                                                                                                | open                                                                                                                         | 9,0 (0,9)                    | -               | 4/0/10                                                |
| 21. Wat zou er verbeterd kunnen worden aan [naam participatie-activiteit]?                                                                                                                                                                                       | open                                                                                                                         | 8,8 (1,1)                    | -               | 6*/2/6                                                |
| 22. Wat zou u ons verder willen laten weten over uw ervaring met [naam participatie-activiteit]?                                                                                                                                                                 | open                                                                                                                         | 8,9 (0,9)                    | -               | 9*/0/5                                                |
| <i>Gemiddelde helderheidsscore Totaal (SD)</i>                                                                                                                                                                                                                   | -                                                                                                                            | 8,3 (0,6)                    | -               | -                                                     |
| <i>Ontbrekende/incorrecte/correcte antwoorden Totaal</i>                                                                                                                                                                                                         | -                                                                                                                            | -                            | -               | 33/13/260                                             |
| <b>APPENDIX</b>                                                                                                                                                                                                                                                  | <b>Antwoordopties</b>                                                                                                        | <b>Gemiddelde score (SD)</b> | <b>Feedback</b> | <b>Ontbrekende / incorrecte / correcte antwoorden</b> |
| 1. Wat is uw geboortejaar                                                                                                                                                                                                                                        | open                                                                                                                         | 9,6 (1,0)                    | -               | 0/0/14                                                |
| 2. Wat is uw geslacht?                                                                                                                                                                                                                                           | Meerkeuze:<br><ul style="list-style-type: none"> <li>▪ Man</li> <li>▪ Vrouw</li> <li>▪ Anders:...</li> </ul>                 | 10 (0)                       | -               | 0/0/14                                                |
| 3. Rekent u zich tot een van de volgende groepen? (Kruis alle opties aan die van toepassing zijn)                                                                                                                                                                | Meerkeuze:<br><ul style="list-style-type: none"> <li>▪ Zichtbare minderheid</li> <li>▪ Personen met een beperking</li> </ul> | 7,4 (2,3)                    | WT              | 4**/0/14                                              |

Appendix B. Overzicht feedback voorlopige vertaling PPEET (versie 0)

4. Wat is uw hoogst genoten opleiding? *NB: In het geval dat u meerdere typen opleidingen afgerond heeft, kruis dan uw hoogst genoten opleiding aan.*

- Autochtone Nederlanders
- Recente immigrant in Nederland
- LGBTQ gemeenschap (lesbisch, homo, bi, transgender, interseksueel/ongedefinieerd)
- Anders:...

Meerkeuze: 9,6 (1,1) - 0/0/14

- Geen onderwijs
- Basisonderwijs (Lagere school), gedeeltelijk of afgerond
- Middelbaar algemeen voortgezet onderwijs (zoals MAVO, (M)ULO, MBO-kort) of Lager of voorbereidend beroepsonderwijs (zoals LTS, LEAS, LHNO, VBO)
- Voortgezet middelbaar onderwijs (zoals MKBO-lang, MTS, MEAO, INAS, HAVO, VWO, Atheneum, Gymnasium, HBS, MMS)
- Hoger onderwijs (zoals HBO, HTS, HEAO, HBO-V, universiteit), gedeeltelijk
- Bachelorgraad (HBO, WO)

Appendix B. Overzicht feedback voorlopige vertaling PPEET (versie 0)

|                                                                                                                                                                                 |                                                                                                                                                                                                                                                                                                                                                                                                          |            |           |   |        |
|---------------------------------------------------------------------------------------------------------------------------------------------------------------------------------|----------------------------------------------------------------------------------------------------------------------------------------------------------------------------------------------------------------------------------------------------------------------------------------------------------------------------------------------------------------------------------------------------------|------------|-----------|---|--------|
|                                                                                                                                                                                 | <ul style="list-style-type: none"> <li>▪ Doctoraal/Mastergraad (WO) of PhD</li> </ul>                                                                                                                                                                                                                                                                                                                    |            |           |   |        |
| 5. Wat is uw huidige werkstatus?                                                                                                                                                | <ul style="list-style-type: none"> <li>▪ Parttime werkzaam (inclusief parttime gepensioneerd, parttime huisvrouw/-man)</li> <li>▪ Betaald werkzaam op oproepbasis</li> <li>▪ Niet werkzaam, arbeidsgeschikt</li> <li>▪ Niet werkzaam, arbeidsongeschikt</li> <li>▪ Gepensioneerd</li> <li>▪ Student (inclusief parttime werkende studenten)</li> <li>▪ Huisvrouw/-man</li> <li>▪ Vrijwilliger</li> </ul> | Meerkeuze: | 9,0 (1,5) | - | 0/7/7  |
| 6. Bent u ooit werkzaam geweest in de gezondheidszorg? <i>NB: We zijn geïnteresseerd in werkervaring in de gezondheidszorg, omdat dit initiatief zich op gezondheid focust.</i> | <ul style="list-style-type: none"> <li>▪ Ja</li> <li>▪ Nee</li> </ul>                                                                                                                                                                                                                                                                                                                                    | Meerkeuze: | 9,6 (1,1) | - | 0/0/14 |
| <i>Gemiddelde helderheidsscore Totaal (SD)</i>                                                                                                                                  | -                                                                                                                                                                                                                                                                                                                                                                                                        |            | 9,2 (0,9) | - |        |
| <i>Ontbrekende/incorrecte/correcte antwoorden Totaal</i>                                                                                                                        | -                                                                                                                                                                                                                                                                                                                                                                                                        |            | -         |   | 4/7/77 |

Score: Gemiddelde helderheidsscore (1-10)

Feedback: Type feedback (BT = beperkte toepasbaarheid, PO = perspectief onduidelijk, VO = verwijzing onduidelijk, WT = woordkeuze of toon)

\*Deze vragen bieden slechts ruimte voor toelichting, daar hoeven respondenten niet altijd gebruik van te maken.

\*\*Hier wordt gevraagd of de respondent behoort tot een van de volgende groepen. Indien dat niet het geval is, hoeft niets te worden aangekruist.



**Tabel B2. Analyse voorlopige vertaling van Projectvragenlijst (versie 0)**

| <b>MODULE A. HET PLANNEN VAN DE PARTICIPATIECOMPONENT VAN UW PROJECT</b>                                                                                                                                                                     | <b>Antwoorδοpties</b>                                                                                                                                                                           | <b>Gemiddelde score (SD)</b> | <b>Feedback</b> | <b>Ontbrekende / incorrecte / correcte antwoorden</b> |
|----------------------------------------------------------------------------------------------------------------------------------------------------------------------------------------------------------------------------------------------|-------------------------------------------------------------------------------------------------------------------------------------------------------------------------------------------------|------------------------------|-----------------|-------------------------------------------------------|
| Introductietekst                                                                                                                                                                                                                             | -                                                                                                                                                                                               | 7,1 (1,4)                    | PO, VO, WT      | -                                                     |
| <b>Achtergrondinformatie</b>                                                                                                                                                                                                                 |                                                                                                                                                                                                 |                              |                 |                                                       |
| 1. Beschrijf uw rol in de participatiecomponent van dit project (bijvoorbeeld, projectleider, participatiecoördinator, etc.)                                                                                                                 | Open                                                                                                                                                                                            | 7,9 (1,7)                    | PO, WT          | 0/0/14                                                |
| 2. Specificeer op wie de uitkomsten van dit project het meest direct effect hebben (bijvoorbeeld, patiënten met artritis, jongeren met mentale gezondheidsproblemen, bewoners van een bepaalde wijk, etc..)                                  | Open                                                                                                                                                                                            | 8,5 (1,0)                    | -               | 0/0/14                                                |
| <b>Deel A. Integriteit van ontwerp en proces</b>                                                                                                                                                                                             |                                                                                                                                                                                                 |                              |                 |                                                       |
| 3. Het participatieplan van het project bevat een duidelijke formulering van de doelstellingen voor de participatie.                                                                                                                         | Likertschaal:<br><ul style="list-style-type: none"> <li>▪ Zeer mee oneens</li> <li>▪ Mee oneens</li> <li>▪ Niet mee eens, niet mee oneens</li> <li>▪ Mee eens</li> <li>Zeer mee eens</li> </ul> | 7,9 (1,0)                    | VO, WT          | 1/0/13                                                |
| 4. Het participatieplan bevat een duidelijke strategie om diegenen te <u>werven</u> op wie de uitkomsten van het project het meest effect hebben (bijvoorbeeld, ervaringsdeskundigen, sociaal-demografische of geografische gemeenschappen). | Likertschaal: zie vraag 3                                                                                                                                                                       | 7,7 (1,3)                    | BT, WT          | 0/0/14                                                |

## Appendix B. Overzicht feedback voorlopige vertaling PPEET (versie 0)

|                                                                                                                                                                                                                                      |                                                                                                         |           |               |        |
|--------------------------------------------------------------------------------------------------------------------------------------------------------------------------------------------------------------------------------------|---------------------------------------------------------------------------------------------------------|-----------|---------------|--------|
| 5. Het participatieplan bevat een duidelijke strategie voor het <u>betrekken</u> van individuen en groepen die afdoende de perspectieven vertegenwoordigen van degenen op wie de uitkomsten van dit project het meest effect hebben. | Likertschaal: zie vraag 3                                                                               | 6,9 (1,8) | VO, WT        | 1/1/12 |
| 6. In het participatieplan is duidelijk vastgelegd hoe wordt tegemoetgekomen aan de financiële-, logistieke- en informatiebehoeften van de deelnemers (bijvoorbeeld, vervoer, maaltijden, vertalingen, kinderopvang).                | Likertschaal: zie vraag 3                                                                               | 7,8 (1,1) | VO, WT        | 0/0/14 |
| 7. Het participatieplan bevat een duidelijke formulering van hoe de uitkomsten voortkomend uit de participatie met de deelnemers worden gedeeld.                                                                                     | Likertschaal: zie vraag 3                                                                               | 7,5 (1,3) | VO, WT        | 1/0/13 |
| 8. In het participatieplan is duidelijk beschreven op welke manier met de deelnemers wordt gecommuniceerd.                                                                                                                           | Likertschaal: zie vraag 3                                                                               | 8,0 (1,5) | -             | 0/0/14 |
| 9. Er zijn plannen voor hoe de cliëntenparticipatie-input zal worden gebruikt in de organisatie.                                                                                                                                     | Likertschaal: zie vraag 3                                                                               | 7,5 (1,8) | BT, VO,<br>WT | 1/1/12 |
| 10. Er is een duidelijk beschreven proces aanwezig voor het communiceren met deelnemers over hoe hun input zal worden gebruikt.                                                                                                      | Likertschaal: zie vraag 3                                                                               | 6,8 (1,5) | VO, WT        | 1/1/12 |
| <b>Deel B. Samenwerking, gemeenschappelijke doelen en partnerschap</b>                                                                                                                                                               |                                                                                                         |           |               |        |
| 11. Bent u van plan om met andere organisaties samen te werken ten aanzien van de participatiecomponent van dit project?                                                                                                             | Meerkeuze:<br>▪ Ja → Noteer hier de organisaties waarmee u van plan bent om samen te werken: ...<br>Nee | 8,0 (1,6) | -             | 0/1/13 |
| 12. We identificeren de doelen voor de participatiecomponent die we gemeenschappelijk hebben met deze organisatie(s).                                                                                                                | Likertschaal: zie vraag 3                                                                               | 6,8 (2,5) | VO, WT        | 0/0/8* |
| 13. We hebben een plan vastgesteld voor hoe we deze gemeenschappelijke doelen willen bereiken middels de participatiecomponent.                                                                                                      | Likertschaal: zie vraag 3                                                                               | 7,8 (1,4) | WT            | 0/0/8* |

Appendix B. Overzicht feedback voorlopige vertaling PPEET (versie 0)

**Deel C. Ter afsluiting**

|                                                                                                                  |                           |           |   |        |
|------------------------------------------------------------------------------------------------------------------|---------------------------|-----------|---|--------|
| 14. Over het geheel genomen ben ik tevreden met de planningsfase van de participatiecomponent.                   | Likertschaal: zie vraag 3 | 8,1 (1,0) | - | 1/0/13 |
| 15. Ik heb vertrouwen in mijn vermogen de participatie-activiteiten van dit project te plannen en uit te voeren. | Likertschaal: zie vraag 3 | 8,3 (1,4) | - | 1/0/13 |

|                                                          |   |           |   |         |
|----------------------------------------------------------|---|-----------|---|---------|
| <i>Gemiddelde helderheidsscore Totaal (SD)</i>           | - | 7,7 (0,5) | - | -       |
| <i>Ontbrekende/incorrecte/correcte antwoorden Totaal</i> | - | -         | - | 7/4/187 |

\* Deze vraag hoefde alleen ingevuld te worden wanneer 11 'ja' was

| <b>MODULE B. HET BEOORDELEN VAN DE PARTICIPATIECOMPONENT VAN UW PROJECT</b>                                                                                              | <b>Antwoordopties</b>                                                                                                                                                                             | <b>Gemiddelde score (SD)</b> | <b>Feedback</b> | <b>Ontbrekende / incorrecte / correcte antwoorden</b> |
|--------------------------------------------------------------------------------------------------------------------------------------------------------------------------|---------------------------------------------------------------------------------------------------------------------------------------------------------------------------------------------------|------------------------------|-----------------|-------------------------------------------------------|
| Introductietekst                                                                                                                                                         | -                                                                                                                                                                                                 | 7,5 (1,5)                    | WT              | -                                                     |
| <b>Deel A. Integriteit van ontwerp en proces</b>                                                                                                                         |                                                                                                                                                                                                   |                              |                 |                                                       |
| 1. De perspectieven van diegenen op wie de uitkomsten van het project het meest effect zullen hebben, werden vertegenwoordigd door de deelnemers aan de participatie.    | Likertschaal:<br><ul style="list-style-type: none"> <li>▪ Zeer mee oneens</li> <li>▪ Mee oneens</li> <li>▪ Niet mee eens, niet mee oneens</li> <li>▪ Mee eens</li> <li>▪ Zeer mee eens</li> </ul> | 7,3 (2,1)                    | WT              | 0/0/14                                                |
| 2. Er werd tegemoetgekomen aan de financiële-, logistieke- en informatiebehoeften van de deelnemers (bijvoorbeeld vervoer, maaltijden, vertalingen, kinderopvang, etc.). | Likertschaal: zie vraag 1                                                                                                                                                                         | 8,2 (1,5)                    | -               | 0/0/14                                                |
| 3. Er was genoeg tijd uitgetrokken om de participatiecomponent te plannen en implementeren.                                                                              | Likertschaal: zie vraag 1                                                                                                                                                                         | 8,1 (1,8)                    | -               | 0/0/14                                                |

## Appendix B. Overzicht feedback voorlopige vertaling PPEET (versie 0)

|                                                                                                                                                      |                                                                                                                                                                                                                               |           |   |         |
|------------------------------------------------------------------------------------------------------------------------------------------------------|-------------------------------------------------------------------------------------------------------------------------------------------------------------------------------------------------------------------------------|-----------|---|---------|
| 4. De doelen voor de participatiecomponent werden gedeeld met de deelnemers.                                                                         | Likertschaal: zie vraag 1                                                                                                                                                                                                     | 8,2 (1,1) | - | 1/0/13  |
| 5. Er is aan de deelnemers verteld hoe de input van de participatiecomponent gebruikt zou worden door de organisatie.                                | Likertschaal: zie vraag 1                                                                                                                                                                                                     | 8,0 (1,6) | - | 1/0/13  |
| <b>Deel B. Invloed en impact</b>                                                                                                                     |                                                                                                                                                                                                                               |           |   |         |
| 6. Was er een samenvattend verslag van de participatiecomponent van het project gemaakt?                                                             | Meerkeuze:<br>▪ Ja<br>▪ Nee                                                                                                                                                                                                   | 8,5 (1,1) | - | 1/1/12  |
| 7. Met wie werd het verslag gedeeld? (Kruis alle opties aan die van toepassing zijn)                                                                 | Meerkeuze:<br>▪ Deelnemers aan de participatie-activiteit<br>▪ Management van de organisatie<br>▪ Bestuursleden<br>▪ Samenwerkingspartners<br>▪ Anders, licht toe: ...                                                        | 8,6 (1,2) | - | 2*/1/11 |
| 8. Kruis aan in de lijst hiernaast hoe de participatie-input was gedeeld met belanghebbenden personen en/of groepen binnen of buiten de organisatie. | Meerkeuze:<br>▪ Schriftelijke verslagen werden beschikbaar gesteld voor geïnteresseerden<br>▪ Presentaties, briefings voor individuen of groepen<br>▪ Informele communicatievormen (bijvoorbeeld e-mails, telefoongesprekken) | 8,3 (1,4) | - | 1*/1/12 |

Appendix B. Overzicht feedback voorlopige vertaling PPEET (versie 0)

|                                                                                                                                                                            |                                                                                                                                                                                                                                           |           |   |         |
|----------------------------------------------------------------------------------------------------------------------------------------------------------------------------|-------------------------------------------------------------------------------------------------------------------------------------------------------------------------------------------------------------------------------------------|-----------|---|---------|
|                                                                                                                                                                            | <ul style="list-style-type: none"> <li>▪ Er werden andere strategieën gebruikt. Beschrijf deze hieronder:<br/>...</li> <li>▪ We hebben de participatie-input niet gedeeld → Waarom werd de input niet met anderen gedeeld? ...</li> </ul> |           |   |         |
| <b>Deel C. Samenwerking, gemeenschappelijke doelen en partnerschap</b>                                                                                                     |                                                                                                                                                                                                                                           |           |   |         |
| 9. We werkten samen met andere organisaties ten aanzien van de participatiecomponent van deze activiteit.                                                                  | Meerkeuze:                                                                                                                                                                                                                                | 8,5 (1,4) | - | 0/1/13  |
|                                                                                                                                                                            | <ul style="list-style-type: none"> <li>▪ Nee</li> <li>▪ Ja → Noteer hier de organisaties waarmee u samen werkte: ...</li> </ul>                                                                                                           |           |   |         |
| 10. We waren in staat gemeenschappelijke doelen met onze partners te identificeren door dit proces.                                                                        | Likertschaal: zie vraag 1                                                                                                                                                                                                                 | 8,3 (1,3) | - | 0/1/6** |
| 11. Bent u van plan in de toekomst opnieuw samen te werken met deze partners?                                                                                              | Meerkeuze:                                                                                                                                                                                                                                | 8,4 (1,7) | - | 0/2/4** |
|                                                                                                                                                                            | <ul style="list-style-type: none"> <li>▪ Nee</li> <li>▪ Ja → Beschrijf uw plannen hieronder: ...</li> </ul>                                                                                                                               |           |   |         |
| <b>Deel D. Ter afsluiting</b>                                                                                                                                              |                                                                                                                                                                                                                                           |           |   |         |
| 12. Over het geheel genomen was ik tevreden met de participatiecomponent van dit project.                                                                                  | Likertschaal: zie vraag 1                                                                                                                                                                                                                 | 8,8 (0,9) | - | 0/0/14  |
| 13. De participatiecomponent was van waarde voor het project waaraan die bijdroeg.                                                                                         | Likertschaal: zie vraag 1                                                                                                                                                                                                                 | 8,6 (1,2) | - | 1/0/13  |
| 14. Als gevolg van mijn betrokkenheid bij de participatiecomponent van dit project, zal ik me comfortabel voelen bij het leiden van toekomstige participatie-activiteiten. | Likertschaal: zie vraag 1                                                                                                                                                                                                                 | 8,2 (1,5) | - | 1/0/13  |

Appendix B. Overzicht feedback voorlopige vertaling PPEET (versie 0)

15. Ik zou graag deelnemen aan training over cliëntenparticipatie om te bouwen aan mijn kunde om meer soortgelijk werk te kunnen doen. Likertschaal: zie vraag 1 6,8 (1,5) VO, WT 0/2/12

|                                                   |   |           |   |         |
|---------------------------------------------------|---|-----------|---|---------|
| Gemiddelde helderheidsscore Totaal (SD)           | - | 8,1 (0,5) | - | -       |
| Ontbrekende/incorrecte/correcte antwoorden Totaal | - | -         | - | 8/9/178 |

*\*Hier wordt gevraagd met wie resultaten worden gedeeld. Indien dat geheel niet gebeurt, hoeft geen antwoord te worden aangekruist.*

*\*\*Deze vraag hoefde niet altijd ingevuld te worden, afhankelijk van de antwoorden op voorgaande vragen.*

| <b>MODULE C. HET BEOORDELEN VAN DE IMPACT VAN DE PARTICIPATIECOMPONENT VAN UW PROJECT</b>                                                    | <b>Antwoordopties</b>                                                                                                                                                                             | <b>Gemiddelde score (SD)</b> | <b>Feedback</b> | <b>Ontbrekende / incorrecte / correcte antwoorden</b> |
|----------------------------------------------------------------------------------------------------------------------------------------------|---------------------------------------------------------------------------------------------------------------------------------------------------------------------------------------------------|------------------------------|-----------------|-------------------------------------------------------|
| Introductietekst                                                                                                                             | -                                                                                                                                                                                                 | 7,7 (1,3)                    | VO, WT          | -                                                     |
| 1. Beschrijf de manieren waarop en de mate waarin publiek, patiënten en/of mantelzorgers het project hebben beïnvloed door hun participatie. | Open: Type invloed: ...<br>Meerkeuze: Hoeveelheid invloed:<br><ul style="list-style-type: none"> <li>▪ Geen</li> <li>▪ Een beetje</li> <li>▪ Matig</li> <li>▪ Veel</li> </ul> Weet ik niet        | 6,2 (2,1)                    | VO, WT          | 4/5/5                                                 |
| 2. De uitkomsten van de participatiecomponent van het project zijn overwogen door diegenen die in een positie zijn er wat mee te doen.       | Likertschaal:<br><ul style="list-style-type: none"> <li>▪ Zeer mee oneens</li> <li>▪ Mee oneens</li> <li>▪ Niet mee eens, niet mee oneens</li> <li>▪ Mee eens</li> <li>▪ Zeer mee eens</li> </ul> | 6,9 (2,2)                    | WT              | 4/0/10                                                |

## Appendix B. Overzicht feedback voorlopige vertaling PPEET (versie 0)

|                                                                                                                                                            |                           |           |        |         |
|------------------------------------------------------------------------------------------------------------------------------------------------------------|---------------------------|-----------|--------|---------|
| 3. Beschrijf op welke manier de bijdragen van de participatiecomponent zijn overwogen door diegenen die in een positie zijn er wat mee te doen.            | Open                      | 7,1 (2,0) | WT     | 5*/0/9  |
| 4. De uitkomsten van de participatiecomponent van dit project hebben de uitkomsten van het project beïnvloed.                                              | Likertschaal: zie vraag 2 | 8,2 (0,9) | -      | 1/0/13  |
| 5. Beschrijf op welke manier de uitkomsten van de participatiecomponent van dit project de uitkomsten van het project hebben beïnvloed.                    | Open                      | 8,2 (0,9) | -      | 3/4/7   |
| 6. Over het geheel genomen was ik tevreden met de participatiecomponent van [naam van het project waaraan de participatiecomponent bijdroeg].              | Likertschaal: zie vraag 2 | 8,6 (0,8) | -      | 2/0/12  |
| 7. De participatiecomponent was een goede besteding van onze middelen.                                                                                     | Likertschaal: zie vraag 2 | 8,5 (1,1) | -      | 1/0/13  |
| 8. Geef hieronder aanvullende feedback op de invloed die de participatiecomponent van dit project heeft gehad op u, uw werk, of uw organisatie als geheel. | Open                      | 7,6 (1,5) | PO, WT | 7**/0/7 |
| <i>Gemiddelde helderheidsscore Totaal (SD)</i>                                                                                                             | -                         | 7,7 (0,8) | -      | -       |
| <i>Ontbrekende/incorrecte/correcte antwoorden Totaal</i>                                                                                                   | -                         | -         | -      | 27/9/76 |

*\*Afhankelijk van het antwoord op de voorgaande vraag hoeft deze vraag niet altijd te worden beantwoord.*

*\*\* Deze vraag biedt slechts ruimte voor toelichting, daar hoeven respondenten niet altijd gebruik van te maken.*

*Score: Gemiddelde helderheidsscore (1-10)*

*Feedback: Type feedback (BT = beperkte toepasbaarheid, PO = perspectief onduidelijk, VO = verwijzing onduidelijk, WT = woordkeuze of toon)*

**Tabel B3. Analyse voorlopige vertaling van Organisatievragenlijst (versie 0)**

|                                                                                                              | Antwoorδοpties                                                                                                                                                                                                            | Gemiddelde score (SD) | Feedback   | Ontbrekende / incorrecte / correcte antwoorden |
|--------------------------------------------------------------------------------------------------------------|---------------------------------------------------------------------------------------------------------------------------------------------------------------------------------------------------------------------------|-----------------------|------------|------------------------------------------------|
| Introductietekst                                                                                             | -                                                                                                                                                                                                                         | 7,1 (1,5)             | VO, WT     | -                                              |
| <b>Achtergrondvragen</b>                                                                                     |                                                                                                                                                                                                                           |                       |            |                                                |
| 1. Wat is uw rol in de organisatie?                                                                          | Meerkeuze:<br><ul style="list-style-type: none"> <li>▪ Bestuurslid</li> <li>▪ Personeel</li> <li>▪ Medior manager</li> <li>▪ Senior manager</li> <li>▪ Anders, licht toe ...</li> </ul>                                   | 7,5 (2,2)             | BT, VO, WT | 0/0/12                                         |
| 2. In hoeverre bent u op de hoogte van de algehele benadering van participatie door de organisatie?          | Likertschaal:<br><ul style="list-style-type: none"> <li>▪ Totaal niet op de hoogte</li> <li>▪ Niet echt op de hoogte</li> <li>▪ Weet ik niet</li> <li>▪ Gedeeltelijk op de hoogte</li> <li>▪ Goed op de hoogte</li> </ul> | 8,5 (1,7)             | -          | 0/0/12                                         |
| 3. Hoe vaak heeft u contact met publieks- en/of patiëntvertegenwoordigers met wie de organisatie samenwerkt? | Likertschaal:<br><ul style="list-style-type: none"> <li>▪ Helemaal niet</li> <li>▪ Zelden</li> <li>▪ Soms</li> <li>▪ Redelijke vaak</li> </ul>                                                                            | 8,6 (1,5)             | -          | 1/0/11                                         |



## Appendix B. Overzicht feedback voorlopige vertaling PPEET (versie 0)

|                                                                                                                                                                                         |                                                                                                                                                                                                          |           |        |        |
|-----------------------------------------------------------------------------------------------------------------------------------------------------------------------------------------|----------------------------------------------------------------------------------------------------------------------------------------------------------------------------------------------------------|-----------|--------|--------|
| 4. In welk stadium zou u zeggen dat uw organisatie is wat betreft het standaard betrekken van publiek en/of patiënten in haar activiteiten?                                             | <ul style="list-style-type: none"> <li>▪ Erg vaak</li> <li>▪ Nog niet begonnen</li> <li>▪ Net begonnen</li> <li>▪ Goed op weg</li> <li>▪ Volledig geïntegreerd</li> </ul>                                | 7,6 (2,4) | WT     | 0/0/12 |
| <b>Deel A. Beleid en praktijken die publiek- en patiëntenparticipatie ondersteunen</b>                                                                                                  |                                                                                                                                                                                                          |           |        |        |
| 5. De organisatie heeft een duidelijk(e) strategie of kader voor participatie die sturing geeft aan activiteiten op dit vlak.                                                           | <ul style="list-style-type: none"> <li>▪ Zeer mee oneens</li> <li>▪ Mee oneens</li> <li>▪ Niet mee eens, niet mee oneens</li> <li>▪ Mee eens</li> <li>▪ Zeer mee eens</li> <li>▪ Weet ik niet</li> </ul> | 8,0 (1,9) | VO, WT | 1/0/11 |
| 6. De organisatie heeft, afhankelijk van het participatie-initiatief, duidelijke strategieën voor het werven van publieks- en patiëntvertegenwoordigers, -adviseurs of co-onderzoekers. | Likertschaal: zie vraag 5                                                                                                                                                                                | 7,6 (1,9) | VO, WT | 0/0/12 |
| 7. Er is duidelijk geïdentificeerd welke middelen binnen de organisatie aan participatie zijn toegewezen.                                                                               | Likertschaal: zie vraag 5                                                                                                                                                                                | 6,7 (1,5) | VO, WT | 0/0/12 |
| 8. De middelen die beschikbaar zijn voor participatie zijn toereikend.                                                                                                                  | Likertschaal: zie vraag 5                                                                                                                                                                                | 8,0 (1,8) | -      | 0/0/12 |
| 9. De organisatie maakt verslagen die samenvatten wat participatie-initiatieven hebben bijgedragen.                                                                                     | Likertschaal: zie vraag 5                                                                                                                                                                                | 7,1 (2,4) | VO, WT | 0/0/12 |
| 10. Gebruik het veld hieronder om uw antwoorden op de vragen in dit deel van de vragenlijst verder toe te lichten, als u dit wilt.                                                      | Open                                                                                                                                                                                                     | 8,8 (1,5) | -      | 7*/0/5 |

## Appendix B. Overzicht feedback voorlopige vertaling PPEET (versie 0)

### Deel B. Participatiecultuur

|                                                                                                                                                                                             |                                                                         |           |        |        |
|---------------------------------------------------------------------------------------------------------------------------------------------------------------------------------------------|-------------------------------------------------------------------------|-----------|--------|--------|
| 11. Belangrijke documenten van de organisatie (bijvoorbeeld missie en visie, strategie, etc.) reflecteren de toewijding aan de waarden en principes van participatie.                       | Likertschaal: zie vraag 5                                               | 7,9 (2,3) | VO, WT | 0/0/12 |
| 12. De organisatiestructuur reflecteert de toewijding aan de waarden en principes van participatie (bijvoorbeeld bestuursfuncties gewijd aan participatie).                                 | Likertschaal: zie vraag 5                                               | 6,9 (2,4) | WT     | 0/0/12 |
| 13. De organisatie heeft formele samenwerkingsverbanden met andere organisaties die een sterke focus op participatie hebben (bijvoorbeeld regionale/nationale/internationale organisaties). | Meerkeuze:<br>▪ Ja → Welke organisaties? ...<br>▪ Nee<br>▪ Weet ik niet | 7,4 (2,7) | VO, WT | 1/0/11 |
| 14. Verantwoordelijkheden betreffende participatie zijn duidelijk verwoord in de functieomschrijvingen van personeel dat deze activiteiten leidt en ondersteunt.                            | Likertschaal: zie vraag 5                                               | 7,9 (1,9) | WT     | 1/1/10 |
| 15. Er zijn uitgebreide participatietraining en -materialen beschikbaar voor personeel dat deze activiteiten leidt en ondersteunt.                                                          | Likertschaal: zie vraag 5                                               | 7,5 (1,7) | WT     | 0/0/12 |
| 16. Ik heb voldoende training in participatie gehad ter ondersteuning van mijn rol.                                                                                                         | Likertschaal: zie vraag 5                                               | 7,9 (1,8) | VO, WT | 0/1/11 |
| 17. Bestuurders binnen de organisatie tonen toewijding voor het herkenbaar integreren van input van publiek- en/of patiëntvertegenwoordigers.                                               | Likertschaal: zie vraag 5                                               | 8,0 (2,0) | -      | 0/0/12 |
| 18. Rapportages die de bijdragen van de participatie-initiatieven samenvatten worden gedeeld met de deelnemers en prominente belanghebbenden.                                               | Likertschaal: zie vraag 5                                               | 8,4 (1,6) | -      | 0/0/12 |
| 19. Gebruik het veld hieronder om uw antwoorden op de vragen in dit deel van de vragenlijst verder toe te lichten, als u dit wilt.                                                          | Open                                                                    | 8,8 (1,3) | -      | 9*/0/3 |

### Deel C. Invloed en impact

|                                                                                                                                      |                                      |           |   |        |
|--------------------------------------------------------------------------------------------------------------------------------------|--------------------------------------|-----------|---|--------|
| 20. De bijdragen die publiek- en patiëntvertegenwoordigers, -adviseurs en co-onderzoekers leveren aan de organisatie zijn zichtbaar. | Likertschaal:<br>▪ Nooit<br>▪ Zelden | 8,0 (1,6) | - | 0/0/12 |
|--------------------------------------------------------------------------------------------------------------------------------------|--------------------------------------|-----------|---|--------|

## Appendix B. Overzicht feedback voorlopige vertaling PPEET (versie 0)

|                                                                                                                                                                                                                                                       | <ul style="list-style-type: none"> <li>▪ Soms</li> <li>▪ Altijd</li> <li>▪ Weet ik niet</li> </ul> |           |               |        |
|-------------------------------------------------------------------------------------------------------------------------------------------------------------------------------------------------------------------------------------------------------|----------------------------------------------------------------------------------------------------|-----------|---------------|--------|
| 21. Bestuurders van de organisatie [of afdeling] gebruiken de input voortkomend uit de participatie-initiatieven.                                                                                                                                     | Likertschaal: zie vraag 20                                                                         | 8,1 (1,3) | -             | 0/0/12 |
| 22. Ik kan voorbeelden noemen waarbij de input van de participatie-initiatieven besluiten binnen de organisatie [of afdeling] heeft beïnvloed.                                                                                                        | Likertschaal: zie vraag 20                                                                         | 7,9 (1,8) | WT            | 0/0/12 |
| 23. Ik kan voorbeelden noemen waarbij de input van de participatie-initiatieven relevante bestuurlijke besluiten (dat wil zeggen, op bestuursniveau) heeft beïnvloed.                                                                                 | Likertschaal: zie vraag 20                                                                         | 7,5 (1,8) | WT            | 0/0/12 |
| 24. Gebruik het veld hieronder om uw antwoorden op de vragen in dit deel van de vragenlijst verder toe te lichten, als u dit wilt.                                                                                                                    | Open                                                                                               | 8,7 (1,4) | -             | 7*/0/5 |
| <b>Deel D. Samenwerking en gemeenschappelijke doelen</b>                                                                                                                                                                                              |                                                                                                    |           |               |        |
| 25. Als gevolg van ons werk met betrekking tot participatie, heeft de organisatie geïdentificeerd welke doelen zij gemeenschappelijk heeft met andere groepen (bijvoorbeeld publiek, financiers, maatschappelijke organisaties, overheidsinstanties). | Likertschaal: zie vraag 5                                                                          | 5,2 (1,9) | PO, VO,<br>WT | 1/0/11 |
| 26. Als gevolg van ons werk met betrekking tot participatie, heeft de organisatie samenwerkingsrelaties ontwikkeld met andere groepen (bijvoorbeeld publiek, financiers, maatschappelijke organisaties, overheidsinstanties).                         | Likertschaal: zie vraag 5                                                                          | 7,0 (2,5) | PO, WT        | 0/0/12 |
| 27. Gebruik het veld hieronder om uw antwoorden op de vragen in dit deel van de vragenlijst verder toe te lichten, als u dit wilt.                                                                                                                    | Open                                                                                               | 8,2 (2,4) | -             | 7*/0/5 |
| <b>Deel E. Ter afsluiting</b>                                                                                                                                                                                                                         |                                                                                                    |           |               |        |
| 28. Over het geheel genomen denk ik dat de organisatie een passend niveau van participatie-activiteit heeft.                                                                                                                                          | Likertschaal: zie vraag 5                                                                          | 8,6 (1,7) | -             | 0/0/12 |

Appendix B. Overzicht feedback voorlopige vertaling PPEET (versie 0)

|                                                                                                                                                          |                           |           |   |        |
|----------------------------------------------------------------------------------------------------------------------------------------------------------|---------------------------|-----------|---|--------|
| 29. Over het geheel genomen denk ik dat deze organisatie een gepaste hoeveelheid middelen wijdt aan het ondersteunen van haar participatie-initiatieven. | Likertschaal: zie vraag 5 | 8,7 (1,4) | - | 0/0/12 |
| 30. Geef hieronder aanvullende reflecties op de participatie binnen uw organisatie, als u dit wilt.                                                      | Open                      | 8,8 (1,3) | - | 8*/0/4 |

|                                                          |   |           |   |          |
|----------------------------------------------------------|---|-----------|---|----------|
| <i>Gemiddelde helderheidsscore Totaal (SD)</i>           | - | 7,8 (0,8) | - | -        |
| <i>Ontbrekende/incorrecte/correcte antwoorden Totaal</i> | - | -         | - | 43/2/315 |

*\*Deze vragen bieden slechts ruimte voor toelichting, daar hoeven respondenten niet altijd gebruik van te maken.*

Score: Gemiddelde helderheidsscore (1-10)

Feedback: Type feedback (BT = beperkte toepasbaarheid, PO = onduidelijk perspectief, VO = onduidelijke verwijzing, WT = woordkeuze of toon)
