# Supplementary material for: Nederlandse vertaling en eerste stappen in validatie van de PPEET om burger- en patiëntenparticipatie te evalueren
Source: Springer Nature journal article supplement (doi:10.1007/s12508-021-00316-9), 2021-10-11
Supplement: MOESM3 [file 19747732]

Nederlandse vertaling van de

**PUBLIC AND PATIENT ENGAGEMENT EVALUATION TOOL (PPEET)**

**Version 2.0**

**August 2018**

*The Public and Patient Engagement Evaluation Tool has been licensed under a Creative Commons Attribution-NonCommercial-Share Alike 4.0 International License. ©2018, Julia Abelson and the PPEET Research-Practice Collaborative. McMaster University. All rights reserved*

Dit document bevat de Nederlandse vertaling van de PPEET, ontwikkeld door onderzoekers aan het LUMC, afdeling Public Health en Eerstelijns geneeskunde, versie 1, 2020. De voorlopige vertaling (versie 0) is ontstaan door middel van een vertalen-en-terugvertalen methode en aangepast op basis van veldwerk tot de huidige versie 1.

De PPEET kan in de huidige vorm worden gebruikt als hulpmiddel bij het plannen, uitvoeren en evalueren van participatie. Het gebruik van de PPEET als uitkomstmaat in onderzoek vereist verdere validatie van het instrument. Door deze vertaling beschikbaar te stellen hopen wij het gebruik van de PPEET en verdere validatie te stimuleren.

Voor achtergrondinformatie en verdere instructies over het gebruik van de PPEET verwijzen wij naar de originele handleiding:

Abelson J and the PPEET Research-Practice Collaborative. Public and Patient Engagement Evaluation Tool (PPEET) version 2.0. Hamilton: McMaster University; 2018. (Beschikbaar via: [Public & Patient Engagement | PPE Evaluation Tool \(mcmaster.ca\)](#))

## MODULE A. EENMALIGE PARTICIPATIE-ACTIVITEITEN

Fijn dat u mee wilt doen aan deze vragenlijst. We zijn geïnteresseerd in uw mening over uw participatie in [voeg naam van participatie-activiteit in]. Participatie is het betrekken van patiënten, cliënten, hun naasten, ervaringsdeskundigen of burgers, en hen invloed laten hebben op besluitvormende processen uit de praktijk van onderzoek, beleid en zorg.

Deze vragenlijst bestaat uit 21 stellingen en vragen. Soms wordt u gevraagd aan te geven in hoeverre u het eens bent met een stelling en soms wordt u om opmerkingen of om uw mening gevraagd. Ons doel is om participatie te kunnen verbeteren. We sporen u aan om uw ervaringen en andere informatie die daarbij zouden kunnen helpen met ons te delen. Uw mening is onmisbaar.

We maken u er graag op attent dat er vertrouwelijk wordt omgegaan met alle informatie die u verstrekt, in overeenstemming met de Algemene Verordening Gegevensbescherming. Indien u vragen heeft over deze vragenlijst, kunt u contact opnemen met [naam] via [telefoon] of [email].

### ACHTERGRONDINFORMATIE

1. Welke rol vertegenwoordigde u in [voeg naam van participatie-activiteit in]?

- Patiënt / patiënt-adviseur of patiënt-partner
- Familielid / Mantelzorger
- Medewerker
- Burger
- Lid van de (patiënten)organisatie
- Anders, licht toe: .....

2. Hoe lang werkt u bij [organisatie] als medewerker of bent u betrokken bij [organisatie] als patiënt-/familie-vertegenwoordiger?

- Korter dan 6 maanden
- 6 - 12 maanden
- 1 - 2 jaar
- 3 - 4 jaar
- 5 jaar of langer

## DEEL I. COMMUNICATIE EN ONDERSTEUNING VOOR PARTICIPATIE

Geef aan in welke mate u het eens bent met elk van de onderstaande stellingen.

3. Het was mij duidelijk wat het doel was van [naam van participatie-activiteit].

| Helemaal<br>mee oneens   | Mee oneens               | Niet mee<br>eens, niet<br>mee oneens | Mee eens                 | Helemaal<br>mee eens     | Niet van<br>toepassing   |
|--------------------------|--------------------------|--------------------------------------|--------------------------|--------------------------|--------------------------|
| <input type="checkbox"/> | <input type="checkbox"/> | <input type="checkbox"/>             | <input type="checkbox"/> | <input type="checkbox"/> | <input type="checkbox"/> |

4. De praktische ondersteuning die ik nodig had om deel te nemen was beschikbaar (bijvoorbeeld vervoer, kinderopvang, vergaderaccommodatie, tolk/begeleiding, vergoeding van kosten, etc.)

| Helemaal<br>mee oneens   | Mee oneens               | Niet mee<br>eens, niet<br>mee oneens | Mee eens                 | Helemaal<br>mee eens     | Niet van<br>toepassing   |
|--------------------------|--------------------------|--------------------------------------|--------------------------|--------------------------|--------------------------|
| <input type="checkbox"/> | <input type="checkbox"/> | <input type="checkbox"/>             | <input type="checkbox"/> | <input type="checkbox"/> | <input type="checkbox"/> |

5. Ik had genoeg informatie (gekregen) om mee te praten over het onderwerp dat werd besproken.

| Helemaal<br>mee oneens   | Mee oneens               | Niet mee<br>eens, niet<br>mee oneens | Mee eens                 | Helemaal<br>mee eens     | Niet van<br>toepassing   |
|--------------------------|--------------------------|--------------------------------------|--------------------------|--------------------------|--------------------------|
| <input type="checkbox"/> | <input type="checkbox"/> | <input type="checkbox"/>             | <input type="checkbox"/> | <input type="checkbox"/> | <input type="checkbox"/> |

6. Wat zou u ons verder willen laten weten over hoe uw deelname aan [naam participatie-activiteit] werd ondersteund? U kunt hieronder ook uw antwoorden op de bovenstaande vragen toelichten.

.....

.....

.....

.....

.....

## DEEL II. HET DELEN VAN UW MENING EN INVALSHOEK

7. Ik kon mijn mening vrijelijk uiten.

|                          |                          |                                      |                          |                          |                          |
|--------------------------|--------------------------|--------------------------------------|--------------------------|--------------------------|--------------------------|
| Helemaal<br>mee oneens   | Mee oneens               | Niet mee<br>eens, niet<br>mee oneens | Mee eens                 | Helemaal<br>mee eens     | Niet van<br>toepassing   |
| <input type="checkbox"/> | <input type="checkbox"/> | <input type="checkbox"/>             | <input type="checkbox"/> | <input type="checkbox"/> | <input type="checkbox"/> |

8. Ik had het gevoel dat mijn mening werd gehoord.

|                          |                          |                                      |                          |                          |                          |
|--------------------------|--------------------------|--------------------------------------|--------------------------|--------------------------|--------------------------|
| Helemaal<br>mee oneens   | Mee oneens               | Niet mee<br>eens, niet<br>mee oneens | Mee eens                 | Helemaal<br>mee eens     | Niet van<br>toepassing   |
| <input type="checkbox"/> | <input type="checkbox"/> | <input type="checkbox"/>             | <input type="checkbox"/> | <input type="checkbox"/> | <input type="checkbox"/> |

9. Er werd een breed scala aan meningen gedeeld over de onderwerpen die werden besproken.

|                          |                          |                                      |                          |                          |                          |
|--------------------------|--------------------------|--------------------------------------|--------------------------|--------------------------|--------------------------|
| Helemaal<br>mee oneens   | Mee oneens               | Niet mee<br>eens, niet<br>mee oneens | Mee eens                 | Helemaal<br>mee eens     | Niet van<br>toepassing   |
| <input type="checkbox"/> | <input type="checkbox"/> | <input type="checkbox"/>             | <input type="checkbox"/> | <input type="checkbox"/> | <input type="checkbox"/> |

10. De deelnemers aan [naam participatie-activiteit] vertegenwoordigden diverse invalshoeken op het onderwerp.

|                          |                          |                                      |                          |                          |                          |
|--------------------------|--------------------------|--------------------------------------|--------------------------|--------------------------|--------------------------|
| Helemaal<br>mee oneens   | Mee oneens               | Niet mee<br>eens, niet<br>mee oneens | Mee eens                 | Helemaal<br>mee eens     | Niet van<br>toepassing   |
| <input type="checkbox"/> | <input type="checkbox"/> | <input type="checkbox"/>             | <input type="checkbox"/> | <input type="checkbox"/> | <input type="checkbox"/> |

11. Wat zou u ons verder willen laten weten over hoe u uw mening kon delen? U kunt hieronder ook uw antwoorden op de bovenstaande vragen toelichten.

.....

.....

.....

.....

.....

### DEEL III. IMPACT EN INVLOED VAN DE PARTICIPATIE-ACTIVITEIT

12. Ik denk dat de doelen die [organisatie] had voor [naam participatie-activiteit] zijn bereikt.

| Helemaal mee oneens      | Mee oneens               | Niet mee eens, niet mee oneens | Mee eens                 | Helemaal mee eens        | Niet van toepassing      |
|--------------------------|--------------------------|--------------------------------|--------------------------|--------------------------|--------------------------|
| <input type="checkbox"/> | <input type="checkbox"/> | <input type="checkbox"/>       | <input type="checkbox"/> | <input type="checkbox"/> | <input type="checkbox"/> |

13. Ik heb er vertrouwen in dat de inbreng die via deze activiteit werd geleverd zal worden gebruikt door [organisatie].

| Helemaal mee oneens      | Mee oneens               | Niet mee eens, niet mee oneens | Mee eens                 | Helemaal mee eens        | Niet van toepassing      |
|--------------------------|--------------------------|--------------------------------|--------------------------|--------------------------|--------------------------|
| <input type="checkbox"/> | <input type="checkbox"/> | <input type="checkbox"/>       | <input type="checkbox"/> | <input type="checkbox"/> | <input type="checkbox"/> |

14. Ik denk dat de inbreng die via deze activiteit werd geleverd een verschil zal maken in het werk van de organisatie.

| Helemaal mee oneens      | Mee oneens               | Niet mee eens, niet mee oneens | Mee eens                 | Helemaal mee eens        | Niet van toepassing      |
|--------------------------|--------------------------|--------------------------------|--------------------------|--------------------------|--------------------------|
| <input type="checkbox"/> | <input type="checkbox"/> | <input type="checkbox"/>       | <input type="checkbox"/> | <input type="checkbox"/> | <input type="checkbox"/> |

15. Wat zou u ons verder willen laten weten over de invloed die u denkt dat [naam participatie-activiteit] zal hebben? U kunt hieronder ook uw antwoorden op de bovenstaande vragen toelichten.

.....

.....

.....

.....

.....

## DEEL IV. TER AFSLUITING

16. Als gevolg van mijn deelname aan [naam participatie-activiteit], ben ik beter geïnformeerd over [vraag de organisatie hier een relevante term in te voegen, bijvoorbeeld patiënten participatie-kwestie, organisatie, gezondheidszorgsysteem, andere focus].

| Helemaal mee oneens      | Mee oneens               | Niet mee eens, niet mee oneens | Mee eens                 | Helemaal mee eens        | Niet van toepassing      |
|--------------------------|--------------------------|--------------------------------|--------------------------|--------------------------|--------------------------|
| <input type="checkbox"/> | <input type="checkbox"/> | <input type="checkbox"/>       | <input type="checkbox"/> | <input type="checkbox"/> | <input type="checkbox"/> |

17. Over het geheel genomen was ik tevreden met dit participatie-initiatief.

| Helemaal mee oneens      | Mee oneens               | Niet mee eens, niet mee oneens | Mee eens                 | Helemaal mee eens        | Niet van toepassing      |
|--------------------------|--------------------------|--------------------------------|--------------------------|--------------------------|--------------------------|
| <input type="checkbox"/> | <input type="checkbox"/> | <input type="checkbox"/>       | <input type="checkbox"/> | <input type="checkbox"/> | <input type="checkbox"/> |

18. Dit participatie-initiatief was een goede besteding van mijn tijd.

| Helemaal mee oneens      | Mee oneens               | Niet mee eens, niet mee oneens | Mee eens                 | Helemaal mee eens        | Niet van toepassing      |
|--------------------------|--------------------------|--------------------------------|--------------------------|--------------------------|--------------------------|
| <input type="checkbox"/> | <input type="checkbox"/> | <input type="checkbox"/>       | <input type="checkbox"/> | <input type="checkbox"/> | <input type="checkbox"/> |

19. Wat waren de sterke punten van [naam participatie-activiteit]?

.....  
.....  
.....

20. Wat zou er verbeterd kunnen worden aan [naam participatie-activiteit]?

.....  
.....  
.....

21. Wat zou u ons verder willen laten weten over uw ervaring met [naam participatie-activiteit]? U kunt hieronder ook uw antwoorden op de bovenstaande vragen toelichten.

.....  
.....  
.....  
.....  
.....

*Hartelijk dank voor uw deelname. Mocht u uw ervaring met de activiteit verder willen bespreken met een lid van de organisatie, dan kunt u contact opnemen met [naam, email].*

## MODULE B. STRUCTURELE PARTICIPATIE-ACTIVITEITEN

Fijn dat u mee wilt doen aan deze vragenlijst. We zijn geïnteresseerd in uw mening over uw participatie in [voeg naam van participatie-activiteit in]. Participatie is het betrekken van patiënten, cliënten, hun naasten, ervaringsdeskundigen of burgers, en hen invloed laten hebben op besluitvormende processen uit de praktijk van onderzoek, beleid en zorg.

Deze vragenlijst bestaat uit 22 stellingen en vragen. Soms wordt u gevraagd aan te geven in hoeverre u het eens bent met een stelling en soms wordt u om opmerkingen of om uw mening gevraagd. Ons doel is om participatie te kunnen verbeteren. We sporen u aan om uw ervaringen en andere informatie die daarbij zouden kunnen helpen met ons te delen. Uw mening is onmisbaar.

We maken u er graag op attent dat er vertrouwelijk wordt omgegaan met alle informatie die u verstrekt, in overeenstemming met de Algemene Verordening Gegevensbescherming. Indien u vragen heeft over deze vragenlijst, kunt u contact opnemen met [naam] via [telefoon] of [email].

### ACHTERGRONDINFORMATIE

1. Welke rol vertegenwoordigt u in [naam van participatie-initiatief]?

- Patiënt / patiënt-adviseur of patiënt-partner
- Familielid / Mantelzorger
- Medewerker
- Burger
- Lid van de (patiënten)organisatie
- Anders, licht toe: .....

2. Hoe lang werkt u bij [organisatie] als medewerker of bent u betrokken bij [organisatie] als patiënt-/familie-vertegenwoordiger?

- Korter dan 6 maanden
- 6 - 12 maanden
- 1 - 2 jaar
- 3 - 4 jaar
- 5 jaar of langer

## DEEL I. COMMUNICATIE EN ONDERSTEUNING VOOR PARTICIPATIE

Geef aan in welke mate u het eens bent met elk van de onderstaande stellingen.

3. Het is mij duidelijk wat het doel is van [naam van participatie-initiatief].

| Helemaal<br>mee oneens   | Mee oneens               | Niet mee<br>eens, niet<br>mee oneens | Mee eens                 | Helemaal<br>mee eens     | Niet van<br>toepassing   |
|--------------------------|--------------------------|--------------------------------------|--------------------------|--------------------------|--------------------------|
| <input type="checkbox"/> | <input type="checkbox"/> | <input type="checkbox"/>             | <input type="checkbox"/> | <input type="checkbox"/> | <input type="checkbox"/> |

4. De praktische ondersteuning die ik nodig heb om deel te nemen is beschikbaar (bijvoorbeeld vervoer, kinderopvang, vergaderaccommodatie, tolk/begeleiding, vergoeding van kosten, etc.).

| Helemaal<br>mee oneens   | Mee oneens               | Niet mee<br>eens, niet<br>mee oneens | Mee eens                 | Helemaal<br>mee eens     | Niet van<br>toepassing   |
|--------------------------|--------------------------|--------------------------------------|--------------------------|--------------------------|--------------------------|
| <input type="checkbox"/> | <input type="checkbox"/> | <input type="checkbox"/>             | <input type="checkbox"/> | <input type="checkbox"/> | <input type="checkbox"/> |

5. Ik heb genoeg informatie (gekregen) om mijn taken uit te kunnen voeren.

| Helemaal<br>mee oneens   | Mee oneens               | Niet mee<br>eens, niet<br>mee oneens | Mee eens                 | Helemaal<br>mee eens     | Niet van<br>toepassing   |
|--------------------------|--------------------------|--------------------------------------|--------------------------|--------------------------|--------------------------|
| <input type="checkbox"/> | <input type="checkbox"/> | <input type="checkbox"/>             | <input type="checkbox"/> | <input type="checkbox"/> | <input type="checkbox"/> |

6. Wat zou u ons verder willen laten weten over hoe uw deelname aan [naam participatie-initiatief] wordt ondersteund? U kunt hieronder ook uw antwoorden op de bovenstaande vragen toelichten.

.....  
.....  
.....  
.....  
.....



## DEEL II. HET DELEN VAN UW MENING EN INVALSHOEK

7. Ik kan mijn mening vrijelijk uiten.

|                          |                          |                                      |                          |                          |                          |
|--------------------------|--------------------------|--------------------------------------|--------------------------|--------------------------|--------------------------|
| Helemaal<br>mee oneens   | Mee oneens               | Niet mee<br>eens, niet<br>mee oneens | Mee eens                 | Helemaal<br>mee eens     | Niet van<br>toepassing   |
| <input type="checkbox"/> | <input type="checkbox"/> | <input type="checkbox"/>             | <input type="checkbox"/> | <input type="checkbox"/> | <input type="checkbox"/> |

8. Ik heb het gevoel dat mijn mening wordt gehoord.

|                          |                          |                                      |                          |                          |                          |
|--------------------------|--------------------------|--------------------------------------|--------------------------|--------------------------|--------------------------|
| Helemaal<br>mee oneens   | Mee oneens               | Niet mee<br>eens, niet<br>mee oneens | Mee eens                 | Helemaal<br>mee eens     | Niet van<br>toepassing   |
| <input type="checkbox"/> | <input type="checkbox"/> | <input type="checkbox"/>             | <input type="checkbox"/> | <input type="checkbox"/> | <input type="checkbox"/> |

9. Er wordt een breed scala aan meningen gedeeld over de onderwerpen die worden besproken.

|                          |                          |                                      |                          |                          |                          |
|--------------------------|--------------------------|--------------------------------------|--------------------------|--------------------------|--------------------------|
| Helemaal<br>mee oneens   | Mee oneens               | Niet mee<br>eens, niet<br>mee oneens | Mee eens                 | Helemaal<br>mee eens     | Niet van<br>toepassing   |
| <input type="checkbox"/> | <input type="checkbox"/> | <input type="checkbox"/>             | <input type="checkbox"/> | <input type="checkbox"/> | <input type="checkbox"/> |

10. De deelnemers aan [naam participatie-initiatief] vertegenwoordigen diverse invalshoeken op het onderwerp/de onderwerpen.

|                          |                          |                                      |                          |                          |                          |
|--------------------------|--------------------------|--------------------------------------|--------------------------|--------------------------|--------------------------|
| Helemaal<br>mee oneens   | Mee oneens               | Niet mee<br>eens, niet<br>mee oneens | Mee eens                 | Helemaal<br>mee eens     | Niet van<br>toepassing   |
| <input type="checkbox"/> | <input type="checkbox"/> | <input type="checkbox"/>             | <input type="checkbox"/> | <input type="checkbox"/> | <input type="checkbox"/> |

11. Wat zou u ons verder willen laten weten over hoe u uw mening kunt delen? U kunt hieronder ook uw antwoorden op de bovenstaande vragen toelichten.

.....

.....

.....

.....

.....

### DEEL III. IMPACT EN INVLOED VAN DE PARTICIPATIE-ACTIVITEIT

12. Ik denk dat [organisatie] haar geformuleerde doelen voor [naam participatie-initiatief] bereikt.

|                          |                          |                                      |                          |                          |                          |
|--------------------------|--------------------------|--------------------------------------|--------------------------|--------------------------|--------------------------|
| Helemaal<br>mee oneens   | Mee oneens               | Niet mee<br>eens, niet<br>mee oneens | Mee eens                 | Helemaal<br>mee eens     | Niet van<br>toepassing   |
| <input type="checkbox"/> | <input type="checkbox"/> | <input type="checkbox"/>             | <input type="checkbox"/> | <input type="checkbox"/> | <input type="checkbox"/> |

13. Ik heb er vertrouwen in dat [organisatie] de inbreng die via [naam participatie-initiatief] wordt geleverd in overweging neemt.

|                          |                          |                                      |                          |                          |                          |
|--------------------------|--------------------------|--------------------------------------|--------------------------|--------------------------|--------------------------|
| Helemaal<br>mee oneens   | Mee oneens               | Niet mee<br>eens, niet<br>mee oneens | Mee eens                 | Helemaal<br>mee eens     | Niet van<br>toepassing   |
| <input type="checkbox"/> | <input type="checkbox"/> | <input type="checkbox"/>             | <input type="checkbox"/> | <input type="checkbox"/> | <input type="checkbox"/> |

14. Ik denk dat het werk van [naam participatie-initiatief] een verschil maakt in het werk van de organisatie.

|                          |                          |                                      |                          |                          |                          |
|--------------------------|--------------------------|--------------------------------------|--------------------------|--------------------------|--------------------------|
| Helemaal<br>mee oneens   | Mee oneens               | Niet mee<br>eens, niet<br>mee oneens | Mee eens                 | Helemaal<br>mee eens     | Niet van<br>toepassing   |
| <input type="checkbox"/> | <input type="checkbox"/> | <input type="checkbox"/>             | <input type="checkbox"/> | <input type="checkbox"/> | <input type="checkbox"/> |

15. Welke invloed denkt u dat u, in uw rol, heeft gehad tot nu toe?

.....

.....

.....

.....

.....

16. Wat zou u ons verder willen laten weten over de invloed die u denkt dat [naam participatie-initiatief] heeft? U kunt hieronder ook uw antwoorden op de bovenstaande vragen toelichten.

.....

.....

.....

.....

.....

## DEEL IV. TER AFSLUITING

17. Als gevolg van mijn deelname aan [naam participatie-activiteit], ben ik beter geïnformeerd over [vraag de organisatie hier een relevante term in te voegen, bijvoorbeeld patiënten participatie-kwestie, organisatie, gezondheidszorgsysteem, andere focus].

|                          |                          |                                      |                          |                          |                          |
|--------------------------|--------------------------|--------------------------------------|--------------------------|--------------------------|--------------------------|
| Helemaal<br>mee oneens   | Mee oneens               | Niet mee<br>eens, niet<br>mee oneens | Mee eens                 | Helemaal<br>mee eens     | Niet van<br>toepassing   |
| <input type="checkbox"/> | <input type="checkbox"/> | <input type="checkbox"/>             | <input type="checkbox"/> | <input type="checkbox"/> | <input type="checkbox"/> |

18. Over het geheel genomen ben ik tevreden met dit participatie-initiatief.

|                          |                          |                                      |                          |                          |                          |
|--------------------------|--------------------------|--------------------------------------|--------------------------|--------------------------|--------------------------|
| Helemaal<br>mee oneens   | Mee oneens               | Niet mee<br>eens, niet<br>mee oneens | Mee eens                 | Helemaal<br>mee eens     | Niet van<br>toepassing   |
| <input type="checkbox"/> | <input type="checkbox"/> | <input type="checkbox"/>             | <input type="checkbox"/> | <input type="checkbox"/> | <input type="checkbox"/> |

19. Dit participatie-initiatief is een goede besteding van mijn tijd.

|                          |                          |                                      |                          |                          |                          |
|--------------------------|--------------------------|--------------------------------------|--------------------------|--------------------------|--------------------------|
| Helemaal<br>mee oneens   | Mee oneens               | Niet mee<br>eens, niet<br>mee oneens | Mee eens                 | Helemaal<br>mee eens     | Niet van<br>toepassing   |
| <input type="checkbox"/> | <input type="checkbox"/> | <input type="checkbox"/>             | <input type="checkbox"/> | <input type="checkbox"/> | <input type="checkbox"/> |

20. Wat zijn de sterke punten van [naam participatie-initiatief]?

.....

.....

.....

21. Wat zou er verbeterd kunnen worden aan [naam participatie-activiteit]?

.....

.....

.....

22. Wat zou u ons verder willen laten weten over uw ervaring met [naam participatie-activiteit]? U kunt hieronder ook uw antwoorden op de bovenstaande vragen toelichten.

.....

.....

.....

.....

*Hartelijk dank voor uw deelname. Mocht u uw ervaring met de activiteit verder willen bespreken met een lid van de organisatie, dan kunt u contact opnemen met [naam, email].*

## APPENDIX A. OPTIONELE VRAGEN DEMOGRAFISCHE KENMERKEN

Tot slot zouden we een paar vragen over u zelf willen stellen. Het doel van het verzamelen van deze informatie is om inzicht te verkrijgen in de achtergrond van de personen en gemeenschappen die we hebben betrokken bij onze participatie initiatieven/activiteiten. Wij maken u er graag op attent dat al uw antwoorden vertrouwelijk worden behandeld, en dat we ieders bijdrage aan dit werk waarderen. Vragen die u niet wenst te beantwoorden kunt u overslaan.

1. Wat is uw geboortejaar? .....

2. Wat is uw geslacht?  Man  
 Vrouw  
 Anders: .....

3. Wat is uw hoogst genoten opleiding? NB: In het geval dat u meerdere typen opleidingen afgerond heeft, kruis dan uw hoogst genoten opleiding aan.

- Geen opleiding
- Lager onderwijs (basisschool, speciaal basisonderwijs), gedeeltelijk of afgerond
- Lager of voorbereidend beroepsonderwijs  
(zoals LTS, LEAO, LHNO, Huishoudschool, VMBO)
- Middelbaar algemeen voortgezet onderwijs  
(zoals MAVO, (M)ULO, MBO-kort, VMBO-t)
- Middelbaar beroepsonderwijs en beroepsbegeleidend onderwijs  
(zoals MKBO-lang, MTS, MEAO, BOL, BBL, INAS)
- Hoger algemeen en voorbereidend wetenschappelijk onderwijs  
(zoals HAVO, VWO, Atheneum, Gymnasium, HBS, MMS)
- Hoger beroepsonderwijs  
(zoals HBO, HTS, HEAO, HBO-V, kandidaats wetenschappelijk onderwijs)
- Wetenschappelijk onderwijs (universiteit)
- Anders, namelijk: .....

4. Wat is uw huidige werkstatus?

- Voltijd werkzaam
- Deeltijd werkzaam (< 35 uur per week)
- Werkloos
- Arbeidsongeschikt
- Gepensioneerd
- Student (inclusief parttime werkende studenten)
- Huisvrouw/-man
- Vrijwilliger

5. Bent u ooit werkzaam geweest als zorgverlener? *NB: We zijn geïnteresseerd in werkervaring in de gezondheidszorg, omdat dit initiatief zich op gezondheid richt.*

- Ja
- Nee

## MODULE A. HET PLANNEN VAN DE PARTICIPATIECOMPONENT VAN UW PROJECT

Participatie is het betrekken van patiënten, cliënten, hun naasten, ervaringsdeskundigen of burgers, en hen invloed laten hebben op besluitvormende processen uit de praktijk van onderzoek, beleid en zorg. Deze module vraagt naar uw respons op het plannen van participatie in [naam van project].

Module A is de eerste van drie modules om de participatie in uw project te evalueren. Modules B en C kunt u invullen nadat het project is afgerond. Module A is ontworpen om zelf te controleren of u op de goede weg bent. Vul deze module in tijdens het proces van plannen en implementeren; hij kan dienen als een checklist om u ervan te verzekeren dat u de belangrijke elementen van participatie toepast.

Module A bestaat uit 15 stellingen en vragen. Soms wordt u gevraagd aan te geven in hoeverre u het eens bent met een stelling en soms wordt u om opmerkingen gevraagd. Denk eraan dat dit een instrument is om uw participatiewerk te kunnen verbeteren. Uitdagingen constateren is een belangrijk onderdeel van dat proces.

### ACHTERGRONDINFORMATIE

1. Benoem uw rol in de participatie in dit project (bijvoorbeeld, projectleider, participatiecoördinator, etc.)

.....  
.....

2. Specificeer op wie de uitkomsten van dit project het meest direct effect hebben (bijvoorbeeld, patiënten met artritis, jongeren met mentale gezondheidsproblemen, bewoners van een bepaalde wijk, etc.).

.....  
.....  
.....

## DEEL I. INTEGRITEIT VAN ONTWERP EN PROCES

3. Het beleid/projectplan voor participatie in [naam project] bevat een duidelijke formulering van de doelstellingen van de participatie.

| Helemaal mee oneens      | Mee oneens               | Niet mee eens, niet mee oneens | Mee eens                 | Helemaal mee eens        | Niet van toepassing      |
|--------------------------|--------------------------|--------------------------------|--------------------------|--------------------------|--------------------------|
| <input type="checkbox"/> | <input type="checkbox"/> | <input type="checkbox"/>       | <input type="checkbox"/> | <input type="checkbox"/> | <input type="checkbox"/> |

4. Het beleid/projectplan bevat een duidelijke aanpak om participanten te werven die direct te maken hebben met de uitkomsten van het project (bijvoorbeeld patiënten, ervaringsdeskundigen, sociaal-demografische of geografische groepen).

| Helemaal mee oneens      | Mee oneens               | Niet mee eens, niet mee oneens | Mee eens                 | Helemaal mee eens        | Niet van toepassing      |
|--------------------------|--------------------------|--------------------------------|--------------------------|--------------------------|--------------------------|
| <input type="checkbox"/> | <input type="checkbox"/> | <input type="checkbox"/>       | <input type="checkbox"/> | <input type="checkbox"/> | <input type="checkbox"/> |

5. Het beleid/projectplan bevat een duidelijke aanpak om de participanten actief te betrekken.

| Helemaal mee oneens      | Mee oneens               | Niet mee eens, niet mee oneens | Mee eens                 | Helemaal mee eens        | Niet van toepassing      |
|--------------------------|--------------------------|--------------------------------|--------------------------|--------------------------|--------------------------|
| <input type="checkbox"/> | <input type="checkbox"/> | <input type="checkbox"/>       | <input type="checkbox"/> | <input type="checkbox"/> | <input type="checkbox"/> |

6. In het beleid/projectplan is duidelijk vastgelegd hoe tegemoet wordt gekomen aan de verwachte financiële-, logistieke- en informatiebehoefte van de participanten (bijvoorbeeld, vervoer, maaltijden, vertalingen, kinderopvang).

| Helemaal mee oneens      | Mee oneens               | Niet mee eens, niet mee oneens | Mee eens                 | Helemaal mee eens        | Niet van toepassing      |
|--------------------------|--------------------------|--------------------------------|--------------------------|--------------------------|--------------------------|
| <input type="checkbox"/> | <input type="checkbox"/> | <input type="checkbox"/>       | <input type="checkbox"/> | <input type="checkbox"/> | <input type="checkbox"/> |

7. In het beleid/projectplan is duidelijk geformuleerd hoe de inbreng van de participanten aan hen wordt teruggekoppeld.

| Helemaal mee oneens      | Mee oneens               | Niet mee eens, niet mee oneens | Mee eens                 | Helemaal mee eens        | Niet van toepassing      |
|--------------------------|--------------------------|--------------------------------|--------------------------|--------------------------|--------------------------|
| <input type="checkbox"/> | <input type="checkbox"/> | <input type="checkbox"/>       | <input type="checkbox"/> | <input type="checkbox"/> | <input type="checkbox"/> |

8. In het beleid/projectplan is duidelijk beschreven op welke manier gedurende het project met de participanten wordt gecommuniceerd.

|                          |                          |                                      |                          |                          |                          |
|--------------------------|--------------------------|--------------------------------------|--------------------------|--------------------------|--------------------------|
| Helemaal<br>mee oneens   | Mee oneens               | Niet mee<br>eens, niet<br>mee oneens | Mee eens                 | Helemaal<br>mee eens     | Niet van<br>toepassing   |
| <input type="checkbox"/> | <input type="checkbox"/> | <input type="checkbox"/>             | <input type="checkbox"/> | <input type="checkbox"/> | <input type="checkbox"/> |

9. Er zijn plannen hoe de inbreng van de participanten zal worden gebruikt in het project of de organisatie.

|                          |                          |                                      |                          |                          |                          |
|--------------------------|--------------------------|--------------------------------------|--------------------------|--------------------------|--------------------------|
| Helemaal<br>mee oneens   | Mee oneens               | Niet mee<br>eens, niet<br>mee oneens | Mee eens                 | Helemaal<br>mee eens     | Niet van<br>toepassing   |
| <input type="checkbox"/> | <input type="checkbox"/> | <input type="checkbox"/>             | <input type="checkbox"/> | <input type="checkbox"/> | <input type="checkbox"/> |

10. Er is een duidelijk plan hoe met participanten wordt gecommuniceerd op welke manier hun inbreng zal worden gebruikt.

|                          |                          |                                      |                          |                          |                          |
|--------------------------|--------------------------|--------------------------------------|--------------------------|--------------------------|--------------------------|
| Helemaal<br>mee oneens   | Mee oneens               | Niet mee<br>eens, niet<br>mee oneens | Mee eens                 | Helemaal<br>mee eens     | Niet van<br>toepassing   |
| <input type="checkbox"/> | <input type="checkbox"/> | <input type="checkbox"/>             | <input type="checkbox"/> | <input type="checkbox"/> | <input type="checkbox"/> |

## DEEL II. SAMENWERKING, GEMEENSCHAPPELIJKE DOELEN EN PARTNERSCHAP

11. Bent u van plan om met andere partners of (patiënt)organisaties samen te werken ten aanzien van de participatie in dit project?

- Ja → Noteer hier de partners of organisaties waarmee u van plan bent om samen te werken: .....
- .....
- .....
- Nee → Ga verder met deel III (vraag 14)

12. We identificeren samen met deze organisatie(s) doelen van participatie

|                          |                          |                                      |                          |                          |                          |
|--------------------------|--------------------------|--------------------------------------|--------------------------|--------------------------|--------------------------|
| Helemaal<br>mee oneens   | Mee oneens               | Niet mee<br>eens, niet<br>mee oneens | Mee eens                 | Helemaal<br>mee eens     | Niet van<br>toepassing   |
| <input type="checkbox"/> | <input type="checkbox"/> | <input type="checkbox"/>             | <input type="checkbox"/> | <input type="checkbox"/> | <input type="checkbox"/> |



13. We hebben een plan vastgesteld voor hoe we deze gemeenschappelijke doelen willen bereiken met behulp van participatie.

|                          |                          |                                      |                          |                          |                          |
|--------------------------|--------------------------|--------------------------------------|--------------------------|--------------------------|--------------------------|
| Helemaal<br>mee oneens   | Mee oneens               | Niet mee<br>eens, niet<br>mee oneens | Mee eens                 | Helemaal<br>mee eens     | Niet van<br>toepassing   |
| <input type="checkbox"/> | <input type="checkbox"/> | <input type="checkbox"/>             | <input type="checkbox"/> | <input type="checkbox"/> | <input type="checkbox"/> |

### DEEL III. TER AFSLUITING

14. Over het geheel genomen ben ik tevreden met (het maken van) de plannen voor participatie in dit project.

|                          |                          |                                      |                          |                          |                          |
|--------------------------|--------------------------|--------------------------------------|--------------------------|--------------------------|--------------------------|
| Helemaal<br>mee oneens   | Mee oneens               | Niet mee<br>eens, niet<br>mee oneens | Mee eens                 | Helemaal<br>mee eens     | Niet van<br>toepassing   |
| <input type="checkbox"/> | <input type="checkbox"/> | <input type="checkbox"/>             | <input type="checkbox"/> | <input type="checkbox"/> | <input type="checkbox"/> |

15. Ik heb vertrouwen in mijn vermogen de participatie-activiteiten van dit project te plannen en uit te voeren.

|                          |                          |                                      |                          |                          |                          |
|--------------------------|--------------------------|--------------------------------------|--------------------------|--------------------------|--------------------------|
| Helemaal<br>mee oneens   | Mee oneens               | Niet mee<br>eens, niet<br>mee oneens | Mee eens                 | Helemaal<br>mee eens     | Niet van<br>toepassing   |
| <input type="checkbox"/> | <input type="checkbox"/> | <input type="checkbox"/>             | <input type="checkbox"/> | <input type="checkbox"/> | <input type="checkbox"/> |

## MODULE B. HET BEOORDELEN VAN DE PARTICIPATIECOMPONENT VAN UW PROJECT

Deze module vraagt naar uw respons op de participatie in [naam van project]. Module B is de tweede van drie modules om participatie te evalueren. Vul deze module in direct nadat de participatie in uw project is afgerond. Indien de participatie een terugkerende activiteit is (bijvoorbeeld een adviesraad), kunt u overwegen deze module op regelmatige basis in te vullen, bijvoorbeeld na elke bijeenkomst. Deze module is ontworpen om u te helpen de pas voltooide participatie te beoordelen, om inzicht te krijgen in wat goed werkte en wat verbeterd kan worden.

De laatste module (Module C) kunt u over 3 – 6 maanden invullen om de impact van de participatie in dit project te beschouwen.

Module B bestaat uit 15 stellingen en vragen. Soms wordt u gevraagd aan te geven in hoeverre u het eens bent met een stelling en soms wordt u om opmerkingen gevraagd. Denk eraan dat dit een instrument is om uw participatiewerk te kunnen verbeteren. Uitdagingen constateren is een belangrijk onderdeel van dat proces.

### DEEL I. INTEGRITEIT VAN ONTWERP EN PROCES

1. De participanten vertegenwoordigden de belangen van diegenen die direct te maken hebben met de uitkomsten van het project.

|                          |                          |                                      |                          |                          |                          |
|--------------------------|--------------------------|--------------------------------------|--------------------------|--------------------------|--------------------------|
| Helemaal<br>mee oneens   | Mee oneens               | Niet mee<br>eens, niet<br>mee oneens | Mee eens                 | Helemaal<br>mee eens     | Niet van<br>toepassing   |
| <input type="checkbox"/> | <input type="checkbox"/> | <input type="checkbox"/>             | <input type="checkbox"/> | <input type="checkbox"/> | <input type="checkbox"/> |

2. Er werd tegemoetgekomen aan de financiële-, logistieke- en informatiebehoefte van de participanten (bijvoorbeeld vervoer, maaltijden, vertalingen, kinderopvang, etc.).

|                          |                          |                                      |                          |                          |                          |
|--------------------------|--------------------------|--------------------------------------|--------------------------|--------------------------|--------------------------|
| Helemaal<br>mee oneens   | Mee oneens               | Niet mee<br>eens, niet<br>mee oneens | Mee eens                 | Helemaal<br>mee eens     | Niet van<br>toepassing   |
| <input type="checkbox"/> | <input type="checkbox"/> | <input type="checkbox"/>             | <input type="checkbox"/> | <input type="checkbox"/> | <input type="checkbox"/> |

3. Er was genoeg tijd uitgetrokken om de participatie te plannen en implementeren.

|                          |                          |                                      |                          |                          |                          |
|--------------------------|--------------------------|--------------------------------------|--------------------------|--------------------------|--------------------------|
| Helemaal<br>mee oneens   | Mee oneens               | Niet mee<br>eens, niet<br>mee oneens | Mee eens                 | Helemaal<br>mee eens     | Niet van<br>toepassing   |
| <input type="checkbox"/> | <input type="checkbox"/> | <input type="checkbox"/>             | <input type="checkbox"/> | <input type="checkbox"/> | <input type="checkbox"/> |

4. De doelen van de participatie werden gedeeld met de participanten.

|                          |                          |                                      |                          |                          |                          |
|--------------------------|--------------------------|--------------------------------------|--------------------------|--------------------------|--------------------------|
| Helemaal<br>mee oneens   | Mee oneens               | Niet mee<br>eens, niet<br>mee oneens | Mee eens                 | Helemaal<br>mee eens     | Niet van<br>toepassing   |
| <input type="checkbox"/> | <input type="checkbox"/> | <input type="checkbox"/>             | <input type="checkbox"/> | <input type="checkbox"/> | <input type="checkbox"/> |

5. Er is aan de participanten verteld hoe hun inbreng gebruikt zou worden in het project of de organisatie.

|                          |                          |                                      |                          |                          |                          |
|--------------------------|--------------------------|--------------------------------------|--------------------------|--------------------------|--------------------------|
| Helemaal<br>mee oneens   | Mee oneens               | Niet mee<br>eens, niet<br>mee oneens | Mee eens                 | Helemaal<br>mee eens     | Niet van<br>toepassing   |
| <input type="checkbox"/> | <input type="checkbox"/> | <input type="checkbox"/>             | <input type="checkbox"/> | <input type="checkbox"/> | <input type="checkbox"/> |

**DEEL II. INVLOED EN IMPACT**

6. Is er een samenvatting of verslag van de participatie in het project gemaakt?

- Ja
- Nee → Ga verder met Deel III (vraag 9)

7. Met wie is het verslag gedeeld? (Kruis alle opties aan die van toepassing zijn)

- Participanten
- (Project)Management
- Bestuursleden
- (Samenwerkings)partners
- Anders, licht toe:  
.....

8. Hoe is de inbreng van participanten gedeeld met belanghebbende personen en/of groepen binnen of buiten de organisatie?

- Schriftelijke verslagen werden beschikbaar gemaakt voor geïnteresseerden
- Presentaties, briefings voor individuen of groepen
- Informele communicatievormen (bijvoorbeeld e-mails, telefoongesprekken)
- Er werden andere strategieën gebruikt. Beschrijf deze hieronder:  
.....  
.....
- We hebben de inbreng van participanten niet gedeeld → Waarom werd de inbreng niet met anderen gedeeld?  
.....

.....  
.....

### DEEL III. SAMENWERKING, GEMEENSCHAPPELIJKE DOELEN EN PARTNERSCHAP

9. We werkten samen met andere partners of (patiënt)organisaties ten aanzien van de participatie in dit project.

- Nee → Ga verder met Deel IV (vraag 12)
- Ja → Noteer hier de partners of (patiënt)organisaties waarmee u samen werkte:

.....  
.....

10. We waren in deze samenwerking in staat om gemeenschappelijke doelen van participatie te identificeren.

| Helemaal mee oneens      | Mee oneens               | Niet mee eens, niet mee oneens | Mee eens                 | Helemaal mee eens        | Niet van toepassing      |
|--------------------------|--------------------------|--------------------------------|--------------------------|--------------------------|--------------------------|
| <input type="checkbox"/> | <input type="checkbox"/> | <input type="checkbox"/>       | <input type="checkbox"/> | <input type="checkbox"/> | <input type="checkbox"/> |

11. Bent u van plan in de toekomst opnieuw samen te werken met deze partners?

- Nee
- Ja → Beschrijf uw plannen hieronder:

.....  
.....  
.....  
.....  
.....

## DEEL IV. TER AFSLUITING

12. Over het geheel genomen ben ik tevreden met de participatie in dit project.

| Helemaal mee oneens      | Mee oneens               | Niet mee eens, niet mee oneens | Mee eens                 | Helemaal mee eens        | Niet van toepassing      |
|--------------------------|--------------------------|--------------------------------|--------------------------|--------------------------|--------------------------|
| <input type="checkbox"/> | <input type="checkbox"/> | <input type="checkbox"/>       | <input type="checkbox"/> | <input type="checkbox"/> | <input type="checkbox"/> |

13. De participatie was van waarde voor het project.

| Helemaal mee oneens      | Mee oneens               | Niet mee eens, niet mee oneens | Mee eens                 | Helemaal mee eens        | Niet van toepassing      |
|--------------------------|--------------------------|--------------------------------|--------------------------|--------------------------|--------------------------|
| <input type="checkbox"/> | <input type="checkbox"/> | <input type="checkbox"/>       | <input type="checkbox"/> | <input type="checkbox"/> | <input type="checkbox"/> |

14. Als gevolg van mijn betrokkenheid bij de participatie in dit project, voel ik me comfortabel bij het organiseren of leiden van eventuele toekomstige participatie-activiteiten.

| Helemaal mee oneens      | Mee oneens               | Niet mee eens, niet mee oneens | Mee eens                 | Helemaal mee eens        | Niet van toepassing      |
|--------------------------|--------------------------|--------------------------------|--------------------------|--------------------------|--------------------------|
| <input type="checkbox"/> | <input type="checkbox"/> | <input type="checkbox"/>       | <input type="checkbox"/> | <input type="checkbox"/> | <input type="checkbox"/> |

15. Ik zou graag deelnemen aan training over participatie om mijn kennis en vaardigheden te vergroten en meer soortgelijk werk te kunnen doen.

Nee

Ja → Welke vaardigheden zou u graag willen ontwikkelen?

.....

.....

.....

.....

## MODULE C. HET BEOORDELEN VAN DE IMPACT VAN DE PARTICIPATIECOMPONENT VAN UW PROJECT

Deze module vraagt naar uw respons op de impact van de participatie in [naam van project]. Dit is de laatste van drie modules om de participatie in uw project te evalueren. U kunt deze module invullen 3 – 6 maanden nadat de participatie in uw project is afgerond, zodat voldoende tijd is verstreken om de impact beoordelen. Indien de participatie een terugkerende activiteit is (bijvoorbeeld een adviesraad), kunt u overwegen deze module op regelmatige basis in te vullen, bijvoorbeeld (half)jaarlijks.

De vragenlijst bestaat uit 8 stellingen en vragen. Soms wordt u gevraagd aan te geven in hoeverre u het eens bent met een stelling en soms wordt u om opmerkingen of feedback gevraagd. We willen u aansporen om uw ervaringen en andere informatie die u relevant acht daar op te schrijven. Denk eraan dat dit een instrument is om uw participatiewerk te kunnen verbeteren. Uitdagingen constateren is een belangrijk onderdeel van dat proces.

1. Beschrijf welk type en de hoeveelheid invloed die patiënten, cliënten, hun naasten, ervaringsdeskundigen of burgers hadden op het project.

| Wie                    | Type invloed                              | Hoeveelheid invloed |        |      |           |              |
|------------------------|-------------------------------------------|---------------------|--------|------|-----------|--------------|
|                        |                                           | Heel weinig         | Weinig | Veel | Heel veel | Weet ik niet |
| <i>Bijv. Patiënten</i> | <i>Bijv. Prioritering van onderwerpen</i> |                     |        |      |           |              |
|                        |                                           |                     |        |      |           |              |
|                        |                                           |                     |        |      |           |              |
|                        |                                           |                     |        |      |           |              |

2. De uitkomsten van de participatie in het project werden serieus genomen door diegenen die in een positie zijn er wat mee te doen.

|                          |                          |                                |                          |                          |                          |
|--------------------------|--------------------------|--------------------------------|--------------------------|--------------------------|--------------------------|
| Helemaal mee oneens      | Mee oneens               | Niet mee eens, niet mee oneens | Mee eens                 | Helemaal mee eens        | Niet van toepassing      |
| <input type="checkbox"/> | <input type="checkbox"/> | <input type="checkbox"/>       | <input type="checkbox"/> | <input type="checkbox"/> | <input type="checkbox"/> |

3. Beschrijf op welke manier deze personen de uitkomsten van de participatie hebben overwogen.

.....  
.....  
.....  
.....  
.....

4. De uitkomsten van de participatie in dit project hebben de uitkomsten van het project beïnvloed.

| Helemaal mee oneens      | Mee oneens               | Niet mee eens, niet mee oneens | Mee eens                 | Helemaal mee eens        | Niet van toepassing      |
|--------------------------|--------------------------|--------------------------------|--------------------------|--------------------------|--------------------------|
| <input type="checkbox"/> | <input type="checkbox"/> | <input type="checkbox"/>       | <input type="checkbox"/> | <input type="checkbox"/> | <input type="checkbox"/> |

5. Beschrijf op welke manier de uitkomsten van de participatie in dit project de uitkomsten van het project hebben beïnvloed.

.....  
.....  
.....  
.....  
.....

6. Over het geheel genomen ben ik tevreden met de participatie in [naam van het project].

| Helemaal mee oneens      | Mee oneens               | Niet mee eens, niet mee oneens | Mee eens                 | Helemaal mee eens        | Niet van toepassing      |
|--------------------------|--------------------------|--------------------------------|--------------------------|--------------------------|--------------------------|
| <input type="checkbox"/> | <input type="checkbox"/> | <input type="checkbox"/>       | <input type="checkbox"/> | <input type="checkbox"/> | <input type="checkbox"/> |

7. De participatie was een goede besteding van onze middelen.

| Helemaal mee oneens      | Mee oneens               | Niet mee eens, niet mee oneens | Mee eens                 | Helemaal mee eens        | Niet van toepassing      |
|--------------------------|--------------------------|--------------------------------|--------------------------|--------------------------|--------------------------|
| <input type="checkbox"/> | <input type="checkbox"/> | <input type="checkbox"/>       | <input type="checkbox"/> | <input type="checkbox"/> | <input type="checkbox"/> |

8. Geef hieronder aanvullende suggesties voor verbetering en/of opmerkingen over de invloed die de participatie in dit project heeft gehad op u, uw werk, of uw project of organisatie als geheel.

.....  
.....  
.....  
.....  
.....

## ORGANISATIE VRAGENLIJST

Participatie is het betrekken van patiënten, cliënten, hun naasten, ervaringsdeskundigen of burgers als vertegenwoordigers, adviseurs of co-onderzoekers. Op deze manier hebben zij invloed op besluitvormende processen uit de praktijk van onderzoek, beleid en zorg. Deze vragenlijst vraagt naar uw opvattingen over het beleid en de processen rond participatie in [naam organisatie of afdeling].

Bedenk bij het beantwoorden van de onderstaande vragen hoe het beleid rond participatie uw werk beïnvloedt. De focus ligt op het evalueren van hoe participatie organisatie-breed, of binnen een bepaald(e) programma of afdeling, wordt uitgevoerd. Het gaat niet om een enkel participatie-initiatief.

De vragenlijst bestaat uit 30 stellingen en vragen. Kruis aan in hoeverre u het eens bent met een stelling, kies slechts één vakje per stelling. Geef aanvullende feedback in de opmerkingen-velden die in de vragenlijst te vinden zijn. We maken u er graag op attent dat al uw antwoorden vertrouwelijk worden behandeld.

Bedankt voor uw deelname!

### ACHTERGRONDVRAGEN

1. Wat is uw rol in de organisatie?

- Bestuurslid / directielid
- Manager
- Medewerker (uitvoerend/adviserend)
- Anders, licht toe: .....

2. In hoeverre bent u op de hoogte van de algehele benadering (bijvoorbeeld de visie, het beleid of de uitvoering) van participatie door de organisatie?

- |                          |                          |                          |                           |                          |
|--------------------------|--------------------------|--------------------------|---------------------------|--------------------------|
| Totaal niet op de hoogte | Niet echt op de hoogte   | Weet ik niet             | Gedeeltelijk op de hoogte | Goed op de hoogte        |
| <input type="checkbox"/> | <input type="checkbox"/> | <input type="checkbox"/> | <input type="checkbox"/>  | <input type="checkbox"/> |



3. Hoe vaak heeft u contact met de participanten (bijvoorbeeld burgers of patiënten) met wie de organisatie samenwerkt?

|                          |                          |                          |                          |                          |
|--------------------------|--------------------------|--------------------------|--------------------------|--------------------------|
| Helemaal niet            | Zelden                   | Soms                     | Redelijk vaak            | Erg vaak                 |
| <input type="checkbox"/> |

4. In welk stadium is uw organisatie wat betreft het betrekken van participanten (bijvoorbeeld burgers of patiënten) in haar activiteiten?

|                          |                          |                          |                          |
|--------------------------|--------------------------|--------------------------|--------------------------|
| Nog niet begonnen        | Net begonnen             | Goed op weg              | Gevestigde praktijk      |
| <input type="checkbox"/> | <input type="checkbox"/> | <input type="checkbox"/> | <input type="checkbox"/> |

## DEEL I. BELEID EN PRAKTIJKEN DIE BURGER- EN PATIENTENPARTICIPATIE ONDERSTEUNEN

5. De organisatie heeft een duidelijk beleid dat sturing geeft aan participatie-activiteiten.

|                          |                          |                                |                          |                          |                          |
|--------------------------|--------------------------|--------------------------------|--------------------------|--------------------------|--------------------------|
| Helemaal mee oneens      | Mee oneens               | Niet mee eens, niet mee oneens | Mee eens                 | Helemaal mee eens        | Weet ik niet             |
| <input type="checkbox"/> | <input type="checkbox"/> | <input type="checkbox"/>       | <input type="checkbox"/> | <input type="checkbox"/> | <input type="checkbox"/> |

6. De organisatie heeft duidelijk beleid voor het werven van burger- of patiëntvertegenwoordigers, -adviseurs of co-onderzoekers, passend bij het participatie-initiatief.

|                          |                          |                                |                          |                          |                          |
|--------------------------|--------------------------|--------------------------------|--------------------------|--------------------------|--------------------------|
| Helemaal mee oneens      | Mee oneens               | Niet mee eens, niet mee oneens | Mee eens                 | Helemaal mee eens        | Weet ik niet             |
| <input type="checkbox"/> | <input type="checkbox"/> | <input type="checkbox"/>       | <input type="checkbox"/> | <input type="checkbox"/> | <input type="checkbox"/> |

7. Het is duidelijk welke middelen (financieel, personeel, et cetera) binnen de organisatie aan participatie zijn toegewezen.

|                          |                          |                                |                          |                          |                          |
|--------------------------|--------------------------|--------------------------------|--------------------------|--------------------------|--------------------------|
| Helemaal mee oneens      | Mee oneens               | Niet mee eens, niet mee oneens | Mee eens                 | Helemaal mee eens        | Weet ik niet             |
| <input type="checkbox"/> | <input type="checkbox"/> | <input type="checkbox"/>       | <input type="checkbox"/> | <input type="checkbox"/> | <input type="checkbox"/> |

8. Er zijn voldoende middelen (financieel, personeel, et cetera) beschikbaar voor participatie.

|                          |                          |                                |                          |                          |                          |
|--------------------------|--------------------------|--------------------------------|--------------------------|--------------------------|--------------------------|
| Helemaal mee oneens      | Mee oneens               | Niet mee eens, niet mee oneens | Mee eens                 | Helemaal mee eens        | Weet ik niet             |
| <input type="checkbox"/> | <input type="checkbox"/> | <input type="checkbox"/>       | <input type="checkbox"/> | <input type="checkbox"/> | <input type="checkbox"/> |

9. De organisatie doet schriftelijk verslag van wat participatie-initiatieven hebben bijgedragen.

| Helemaal mee oneens      | Mee oneens               | Niet mee eens, niet mee oneens | Mee eens                 | Helemaal mee eens        | Weet ik niet             |
|--------------------------|--------------------------|--------------------------------|--------------------------|--------------------------|--------------------------|
| <input type="checkbox"/> | <input type="checkbox"/> | <input type="checkbox"/>       | <input type="checkbox"/> | <input type="checkbox"/> | <input type="checkbox"/> |

10. U kunt het veld hieronder gebruiken om uw antwoorden op de vragen in deel I van de vragenlijst verder toe te lichten.

.....

.....

.....

.....

.....

## DEEL II. PARTICIPATIECULTUUR

11. Het belang dat de organisatie hecht aan de waarden en principes van participatie is weergegeven in belangrijke documenten (bijvoorbeeld missie en visie, strategie, etc.) .

| Helemaal mee oneens      | Mee oneens               | Niet mee eens, niet mee oneens | Mee eens                 | Helemaal mee eens        | Weet ik niet             |
|--------------------------|--------------------------|--------------------------------|--------------------------|--------------------------|--------------------------|
| <input type="checkbox"/> | <input type="checkbox"/> | <input type="checkbox"/>       | <input type="checkbox"/> | <input type="checkbox"/> | <input type="checkbox"/> |

12. Het belang dat de organisatie hecht aan de waarden en principes van participatie komt tot uiting in de organisatiestructuur (bijvoorbeeld leidinggevende posities voor participanten).

| Helemaal mee oneens      | Mee oneens               | Niet mee eens, niet mee oneens | Mee eens                 | Helemaal mee eens        | Weet ik niet             |
|--------------------------|--------------------------|--------------------------------|--------------------------|--------------------------|--------------------------|
| <input type="checkbox"/> | <input type="checkbox"/> | <input type="checkbox"/>       | <input type="checkbox"/> | <input type="checkbox"/> | <input type="checkbox"/> |

13. De organisatie heeft samenwerkingsafspraken met andere organisaties die een sterke focus op participatie hebben (bijvoorbeeld regionale/nationale/ internationale patiëntenorganisaties).

Ja → Welke organisaties? .....

.....

Nee

Weet ik niet

14. Verantwoordelijkheden betreffende participatie zijn duidelijk verwoord in de functieomschrijvingen van medewerkers die deze activiteiten leiden en ondersteunen.

|                          |                          |                                |                          |                          |                          |
|--------------------------|--------------------------|--------------------------------|--------------------------|--------------------------|--------------------------|
| Helemaal mee oneens      | Mee oneens               | Niet mee eens, niet mee oneens | Mee eens                 | Helemaal mee eens        | Weet ik niet             |
| <input type="checkbox"/> | <input type="checkbox"/> | <input type="checkbox"/>       | <input type="checkbox"/> | <input type="checkbox"/> | <input type="checkbox"/> |

15. Er zijn scholingsmogelijkheden en materialen beschikbaar voor medewerkers die participatie-activiteiten leiden en ondersteunen.

|                          |                          |                                |                          |                          |                          |
|--------------------------|--------------------------|--------------------------------|--------------------------|--------------------------|--------------------------|
| Helemaal mee oneens      | Mee oneens               | Niet mee eens, niet mee oneens | Mee eens                 | Helemaal mee eens        | Weet ik niet             |
| <input type="checkbox"/> | <input type="checkbox"/> | <input type="checkbox"/>       | <input type="checkbox"/> | <input type="checkbox"/> | <input type="checkbox"/> |

16. Ik heb voldoende scholing in participatie gehad ter ondersteuning van mijn rol.

|                          |                          |                                |                          |                          |                          |
|--------------------------|--------------------------|--------------------------------|--------------------------|--------------------------|--------------------------|
| Helemaal mee oneens      | Mee oneens               | Niet mee eens, niet mee oneens | Mee eens                 | Helemaal mee eens        | Weet ik niet             |
| <input type="checkbox"/> | <input type="checkbox"/> | <input type="checkbox"/>       | <input type="checkbox"/> | <input type="checkbox"/> | <input type="checkbox"/> |

17. Bestuurders binnen de organisatie doen hun best om inbreng van participanten te integreren.

|                          |                          |                                |                          |                          |                          |
|--------------------------|--------------------------|--------------------------------|--------------------------|--------------------------|--------------------------|
| Helemaal mee oneens      | Mee oneens               | Niet mee eens, niet mee oneens | Mee eens                 | Helemaal mee eens        | Weet ik niet             |
| <input type="checkbox"/> | <input type="checkbox"/> | <input type="checkbox"/>       | <input type="checkbox"/> | <input type="checkbox"/> | <input type="checkbox"/> |

18. Rapportages die de bijdragen van de participatie-initiatieven samenvatten worden gedeeld met de participanten en relevante belanghebbenden.

|                          |                          |                                |                          |                          |                          |
|--------------------------|--------------------------|--------------------------------|--------------------------|--------------------------|--------------------------|
| Helemaal mee oneens      | Mee oneens               | Niet mee eens, niet mee oneens | Mee eens                 | Helemaal mee eens        | Weet ik niet             |
| <input type="checkbox"/> | <input type="checkbox"/> | <input type="checkbox"/>       | <input type="checkbox"/> | <input type="checkbox"/> | <input type="checkbox"/> |

19. U kunt het veld hieronder gebruiken om uw antwoorden op de vragen in deel II van de vragenlijst verder toe te lichten.

.....  
.....  
.....  
.....  
.....

### DEEL III. INVLOED EN IMPACT

*\*\*NB, de keuzeopties zijn anders dan in de voorgaande delen\*\**

20. De bijdragen die burger- en patiëntvertegenwoordigers, -adviseurs en co-onderzoekers leveren aan de organisatie zijn zichtbaar.

|                          |                          |                          |                          |                          |
|--------------------------|--------------------------|--------------------------|--------------------------|--------------------------|
| Nooit                    | Soms                     | Vaak                     | Altijd                   | Weet ik niet             |
| <input type="checkbox"/> |

21. Bestuurders van de organisatie [of afdelingshoofden] gebruiken de inbreng vanuit de participatie-initiatieven.

|                          |                          |                          |                          |                          |
|--------------------------|--------------------------|--------------------------|--------------------------|--------------------------|
| Nooit                    | Soms                     | Vaak                     | Altijd                   | Weet ik niet             |
| <input type="checkbox"/> |

22. Er zijn gevallen waarbij de inbreng vanuit de participatie-initiatieven besluiten binnen de organisatie [of afdeling] heeft beïnvloed (dat wil zeggen, op de werkvloer).

|                          |                          |                          |                          |                          |
|--------------------------|--------------------------|--------------------------|--------------------------|--------------------------|
| Nooit                    | Soms                     | Vaak                     | Altijd                   | Weet ik niet             |
| <input type="checkbox"/> |

23. Er zijn gevallen waarbij de inbreng vanuit de participatie-initiatieven belangrijke bestuursbesluiten heeft beïnvloed (dat wil zeggen, op directieniveau).

|                          |                          |                          |                          |                          |
|--------------------------|--------------------------|--------------------------|--------------------------|--------------------------|
| Nooit                    | Soms                     | Vaak                     | Altijd                   | Weet ik niet             |
| <input type="checkbox"/> |

24. U kunt het veld hieronder gebruiken om uw antwoorden op de vragen in deel III van de vragenlijst verder toe te lichten.

.....

.....

.....

.....

.....

### DEEL IV. SAMENWERKING EN GEMEENSCHAPPELIJKE DOELEN

25. Door het betrekken van participanten heeft onze organisatie gemeenschappelijke doelen van participatie met andere groepen geïdentificeerd (bijvoorbeeld met burgers, financiers, maatschappelijke organisaties, overheidsinstanties).

|                          |                          |                                      |                          |                          |                          |
|--------------------------|--------------------------|--------------------------------------|--------------------------|--------------------------|--------------------------|
| Helemaal<br>mee oneens   | Mee oneens               | Niet mee<br>eens, niet<br>mee oneens | Mee eens                 | Helemaal<br>mee eens     | Weet ik<br>niet          |
| <input type="checkbox"/> | <input type="checkbox"/> | <input type="checkbox"/>             | <input type="checkbox"/> | <input type="checkbox"/> | <input type="checkbox"/> |

26. Door het betrekken van participanten heeft onze organisatie samenwerkingsrelaties met andere groepen ontwikkeld (bijvoorbeeld met burgers, financiers, maatschappelijke organisaties, overheidsinstanties).

| Helemaal<br>mee oneens   | Mee oneens               | Niet mee<br>eens, niet<br>mee oneens | Mee eens                 | Helemaal<br>mee eens     | Weet ik<br>niet          |
|--------------------------|--------------------------|--------------------------------------|--------------------------|--------------------------|--------------------------|
| <input type="checkbox"/> | <input type="checkbox"/> | <input type="checkbox"/>             | <input type="checkbox"/> | <input type="checkbox"/> | <input type="checkbox"/> |

27. U kunt het veld hieronder gebruiken om uw antwoorden op de vragen in deel IV van de vragenlijst verder toe te lichten.

.....

.....

.....

.....

.....

## DEEL V. TER AFSLUITING

28. Over het geheel genomen denk ik dat de organisatie een passend niveau van participatie heeft.

| Helemaal<br>mee oneens   | Mee oneens               | Niet mee<br>eens, niet<br>mee oneens | Mee eens                 | Helemaal<br>mee eens     | Weet ik<br>niet          |
|--------------------------|--------------------------|--------------------------------------|--------------------------|--------------------------|--------------------------|
| <input type="checkbox"/> | <input type="checkbox"/> | <input type="checkbox"/>             | <input type="checkbox"/> | <input type="checkbox"/> | <input type="checkbox"/> |

29. Over het geheel genomen denk ik dat deze organisatie een gepaste hoeveelheid middelen wijdt aan het ondersteunen van participatie.

| Helemaal<br>mee oneens   | Mee oneens               | Niet mee<br>eens, niet<br>mee oneens | Mee eens                 | Helemaal<br>mee eens     | Weet ik<br>niet          |
|--------------------------|--------------------------|--------------------------------------|--------------------------|--------------------------|--------------------------|
| <input type="checkbox"/> | <input type="checkbox"/> | <input type="checkbox"/>             | <input type="checkbox"/> | <input type="checkbox"/> | <input type="checkbox"/> |

30. U kunt hieronder aanvullende reflecties geven op participatie binnen uw organisatie.

.....

.....

.....

.....

.....
